# Supplementary material for: Maturation of selected human mitochondrial tRNAs requires deadenylation
Source: eLife. 2017 Jul 26;6:e27596. doi: 10.7554/eLife.27596 (PMC5544427; doi:10.7554/eLife.27596)
Supplement: Figure 4—source data 1. — DOI: http://dx.doi.org/10.7554/eLife.27596.009 [file elife-27596-fig4-data1.xls]

## Sheet: HEK293 (PDE12++)
Figure 4-source data 1 - Read count for mitochondrial poly(A) (MPAT) next generation RNA sequencing (MPAT-Seq)
mt-tRNA	mt-tRNA position	Expected nt	Total read count for position	Read count for A	Read count for C	Read count for G	Read count for T
MT-TL1	75	A	4703	4684	4	8	7
MT-TL1	+1	N	4358	76	4280	1	1
MT-TL1	+2	N	4311	55	4254	2
MT-TL1	+3	N	4225	4214	5	4	2
MT-TL1	+4	N	1399	1282	90	26	1
MT-TL1	+5	N	1344	1312	27	2	3
MT-TL1	+6	N	1282	1278	1	3
MT-TL1	+7	N	1160	1128	1	30	1
MT-TL1	+8	N	966	935		1	30
MT-TL1	+9	N	663	633		30
MT-TL1	+10	N	446	416			30
MT-TL1	+11	N	269	239		30
MT-TL1	+12	N	204	177			27
MT-TL1	+13	N	124	100			24
mt-tRNA	mt-tRNA position	Expected nt	Total read count for position	Read count for A	Read count for C	Read count for G	Read count for T
MT-TN	73	G	70527	8277	610	61383	257
MT-TN	+1	N	70127	8738	44824	203	16362
MT-TN	+2	N	67951	22478	45093	188	192
MT-TN	+3	N	64736	63800	894	22	20
MT-TN	+4	N	24514	23766	203	202	343
MT-TN	+5	N	19746	19260	12	209	265
MT-TN	+6	N	14533	14125	10	380	18
MT-TN	+7	N	10455	10383	5	29	38
MT-TN	+8	N	8163	8110	19	17	17
MT-TN	+9	N	6453	6431	2	13	7
MT-TN	+10	N	4144	4128	3	8	5
MT-TN	+11	N	2689	2677	1	6	5
MT-TN	+12	N	1035	1030	2	1	2
mt-tRNA	mt-tRNA position	Expected nt	Total read count for position	Read count for A	Read count for C	Read count for G	Read count for T
MT-TQ	72	G	1946	257	1	1688
MT-TQ	+1	N	1926	281	1642	1	2
MT-TQ	+2	N	1883	239	1644
MT-TQ	+3	N	1852	1852
MT-TQ	+4	N	263	261			2
MT-TQ	+5	N	188	187	1
MT-TQ	+6	N	159	159
MT-TQ	+7	N	146	145		1
MT-TQ	+8	N	137	136		1
MT-TQ	+9	N	53	52		1
MT-TQ	+10	N	19	18		1
MT-TQ	+11	N	9	9
MT-TQ	+12	N	5	5
mt-tRNA	mt-tRNA position	Expected nt	Total read count for position	Read count for A	Read count for C	Read count for G	Read count for T
MT-TF	71	A	5752	5740	3	8	1
MT-TF	+1	N	5692	194	5497	1
MT-TF	+2	N	5650	105	5539	1	5
MT-TF	+3	N	5479	5234	213	6	26
MT-TF	+4	N	1840	1773	55	11	1
MT-TF	+5	N	1596	1540	12	26	18
MT-TF	+6	N	1457	1440	1	15	1
MT-TF	+7	N	1284	1269	6	1	8
MT-TF	+8	N	1115	1099	6	7	3
MT-TF	+9	N	905	901	2		2
MT-TF	+10	N	685	683		2
MT-TF	+11	N	466	465	1
MT-TF	+12	N	247	245			2
mt-tRNA	mt-tRNA position	Expected nt	Total read count for position	Read count for A	Read count for C	Read count for G	Read count for T
MT-TL2	71	A	1796	1793		2	1
MT-TL2	+1	N	1668	67	1599	2
MT-TL2	+2	N	1646	53	1593
MT-TL2	+3	N	1604	1602			2
MT-TL2	+4	N	166	128	38
MT-TL2	+5	N	51	51
MT-TL2	+6	N	14	14
MT-TL2	+7	N	14	14
MT-TL2	+8	N	12	12
MT-TL2	+9	N	8	8
MT-TL2	+10	N	1	1
MT-TL2	+11	N	1	1
mt-tRNA	mt-tRNA position	Expected nt	Total read count for position	Read count for A	Read count for C	Read count for G	Read count for T
MT-TK	70	A	28011	27936	32	12	31
MT-TK	+1	N	26900	800	26073	22	5
MT-TK	+2	N	26396	823	25552	7	14
MT-TK	+3	N	25985	25901	64	13	7
MT-TK	+4	N	2084	1957	60	14	53
MT-TK	+5	N	1687	1586	8	5	88
MT-TK	+6	N	1512	1427	21	60	4
MT-TK	+7	N	1391	1357	3	1	30
MT-TK	+8	N	1280	1253	1	24	2
MT-TK	+9	N	1109	1109
MT-TK	+10	N	909	899		9	1
MT-TK	+11	N	659	659
MT-TK	+12	N	372	370	1	1
mt-tRNA	mt-tRNA position	Expected nt	Total read count for position	Read count for A	Read count for C	Read count for G	Read count for T
MT-TH	70	C	27895	1302	26567	7	19
MT-TH	+1	N	26408	798	25550	49	11
MT-TH	+2	N	25629	581	25040	2	6
MT-TH	+3	N	25189	25111	55	16	7
MT-TH	+4	N	783	714	67	1	1
MT-TH	+5	N	643	621	12	3	7
MT-TH	+6	N	555	511	36	6	2
MT-TH	+7	N	468	431	29	1	7
MT-TH	+8	N	418	407	7	3	1
MT-TH	+9	N	338	332	6
MT-TH	+10	N	167	167
MT-TH	+11	N	94	94
MT-TH	+12	N	9	9
mt-tRNA	mt-tRNA position	Expected nt	Total read count for position	Read count for A	Read count for C	Read count for G	Read count for T
MT-TV	69	A	13425	13374	9	18	24
MT-TV	+1	N	12433	68	12355	7	3
MT-TV	+2	N	11766	59	11682	5	20
MT-TV	+3	N	11522	11487	6	23	6
MT-TV	+4	N	169	118	14	11	26
MT-TV	+5	N	98	55	4	17	22
MT-TV	+6	N	51	24	5	19	3
MT-TV	+7	N	49	24	12	4	9
MT-TV	+8	N	42	26	4	11	1
MT-TV	+9	N	25	25
MT-TV	+10	N	23	19	4
MT-TV	+11	N	16	16
mt-tRNA	mt-tRNA position	Expected nt	Total read count for position	Read count for A	Read count for C	Read count for G	Read count for T
MT-TI	69	A	226	226
MT-TI	+1	N	213	69	143	1
MT-TI	+2	N	211	80	129	2
MT-TI	+3	N	209	209
MT-TI	+4	N	125	123	2
MT-TI	+5	N	116	114			2
MT-TI	+6	N	109	109
MT-TI	+7	N	99	98			1
MT-TI	+8	N	80	80
MT-TI	+9	N	76	75		1
MT-TI	+10	N	61	61
MT-TI	+11	N	48	48
MT-TI	+12	N	28	28
mt-tRNA	mt-tRNA position	Expected nt	Total read count for position	Read count for A	Read count for C	Read count for G	Read count for T
MT-TA	69	A	21008	20989	4	6	9
MT-TA	+1	N	20673	1207	19147	311	8
MT-TA	+2	N	19343	279	19050	4	10
MT-TA	+3	N	19204	19172	6	15	11
MT-TA	+4	N	4224	4212	2	10
MT-TA	+5	N	1695	1675	2	4	14
MT-TA	+6	N	1677	1666	1	9	1
MT-TA	+7	N	1310	1301		3	6
MT-TA	+8	N	1305	1292	3	7	3
MT-TA	+9	N	564	563		1
MT-TA	+10	N	209	208		1
MT-TA	+11	N	22	22
MT-TA	+12	N	4	4
mt-tRNA	mt-tRNA position	Expected nt	Total read count for position	Read count for A	Read count for C	Read count for G	Read count for T
MT-TE	69	A	9387	9375	3	6	3
MT-TE	+1	N	9123	115	8973	27	8
MT-TE	+2	N	8974	131	8809	3	31
MT-TE	+3	N	8720	8672	4	14	30
MT-TE	+4	N	991	869	61	52	9
MT-TE	+5	N	788	693	1	9	85
MT-TE	+6	N	680	655	2	9	14
MT-TE	+7	N	663	638	14	2	9
MT-TE	+8	N	593	587	1	1	4
MT-TE	+9	N	537	533		1	3
MT-TE	+10	N	461	458		2	1
MT-TE	+11	N	366	364	2
MT-TE	+12	N	192	192
mt-tRNA	mt-tRNA position	Expected nt	Total read count for position	Read count for A	Read count for C	Read count for G	Read count for T
MT-TS	69	G	254	121	4	129
MT-TS	+1	N	247	111	129		7
MT-TS	+2	N	220	90	130
MT-TS	+3	N	169	163			6
MT-TS	+4	N	48	45	2	1
MT-TS	+5	N	34	27		7
MT-TS	+6	N	25	24			1
MT-TS	+7	N	21	18		1	2
MT-TS	+8	N	9	9
MT-TS	+9	N	7	7
MT-TS	+10	N	5	5
MT-TS	+11	N	3	3
MT-TS	+12	N	3	3
mt-tRNA	mt-tRNA position	Expected nt	Total read count for position	Read count for A	Read count for C	Read count for G	Read count for T
MT-TP	68	A	3102	3099	1	1	1
MT-TP	+1	N	3078	58	2670	3	347
MT-TP	+2	N	3023	54	2637	1	331
MT-TP	+3	N	2973	2639	98	1	235
MT-TP	+4	N	688	592	26	65	5
MT-TP	+5	N	461	432		1	28
MT-TP	+6	N	418	415	1	2
MT-TP	+7	N	383	379		1	3
MT-TP	+8	N	274	271	1	1	1
MT-TP	+9	N	131	130	1
MT-TP	+10	N	92	90		2
MT-TP	+11	N	41	41
mt-tRNA	mt-tRNA position	Expected nt	Total read count for position	Read count for A	Read count for C	Read count for G	Read count for T
MT-TM	68	A	82115	81852	49	127	87
MT-TM	+1	N	81092	834	80228	4	26
MT-TM	+2	N	79823	1017	78769	11	26
MT-TM	+3	N	77333	77058	208	32	35
MT-TM	+4	N	4611	4385	144	34	48
MT-TM	+5	N	3682	2888	672	60	62
MT-TM	+6	N	3282	3101	111	62	8
MT-TM	+7	N	2999	2312	614	4	69
MT-TM	+8	N	2640	2053	514	36	37
MT-TM	+9	N	2121	2090	15	7	9
MT-TM	+10	N	1333	1317	2	3	11
MT-TM	+11	N	758	752		4	2
mt-tRNA	mt-tRNA position	Expected nt	Total read count for position	Read count for A	Read count for C	Read count for G	Read count for T
MT-TW	68	G	5727	76		5644	7
MT-TW	+1	N	5723	50	5648		25
MT-TW	+2	N	5652	63	5583	1	5
MT-TW	+3	N	5489	5349	137	1	2
MT-TW	+4	N	467	402	60	5
MT-TW	+5	N	347	334		4	9
MT-TW	+6	N	317	302	3	4	8
MT-TW	+7	N	317	308		9
MT-TW	+8	N	307	307
MT-TW	+9	N	266	266
MT-TW	+10	N	192	190	1		1
MT-TW	+11	N	113	113
mt-tRNA	mt-tRNA position	Expected nt	Total read count for position	Read count for A	Read count for C	Read count for G	Read count for T
MT-TT	68	A	36628	36305	229	58	36
MT-TT	+1	N	35784	1832	33939	5	8
MT-TT	+2	N	34593	1761	32793	3	36
MT-TT	+3	N	33414	33277	67	48	22
MT-TT	+4	N	1669	1127	459	26	57
MT-TT	+5	N	1268	848	371	21	28
MT-TT	+6	N	874	836		32	6
MT-TT	+7	N	696	634	27	23	12
MT-TT	+8	N	572	536	5	11	20
MT-TT	+9	N	414	403		10	1
MT-TT	+10	N	339	337		2
MT-TT	+11	N	153	153
mt-tRNA	mt-tRNA position	Expected nt	Total read count for position	Read count for A	Read count for C	Read count for G	Read count for T
MT-TG	68	A	64177	64043	52	51	31
MT-TG	+1	N	61636	464	61120	3	49
MT-TG	+2	N	60936	548	60326	20	42
MT-TG	+3	N	59954	59830	77	22	25
MT-TG	+4	N	1723	1390	233	12	88
MT-TG	+5	N	1459	1223	75	11	150
MT-TG	+6	N	1226	1108	1	114	3
MT-TG	+7	N	1113	1000	2	34	77
MT-TG	+8	N	1039	941	25	68	5
MT-TG	+9	N	888	887		1
MT-TG	+10	N	744	743			1
MT-TG	+11	N	544	544
MT-TG	+12	N	1	1
mt-tRNA	mt-tRNA position	Expected nt	Total read count for position	Read count for A	Read count for C	Read count for G	Read count for T
MT-TT	66	A	6149	6144	3	2
MT-TT	+1	N	6089	111	5977		1
MT-TT	+2	N	6087	123	5962		2
MT-TT	+3	N	6049	6019	4	2	24
MT-TT	+4	N	1142	1118	24
MT-TT	+5	N	689	687			2
MT-TT	+6	N	678	657		21
MT-TT	+7	N	579	578	1
MT-TT	+8	N	523	522		1
MT-TT	+9	N	445	445
MT-TT	+10	N	356	355		1
MT-TT	+11	N	164	164
mt-tRNA	mt-tRNA position	Expected nt	Total read count for position	Read count for A	Read count for C	Read count for G	Read count for T
MT-TY	66	A	1664	1546	116	1	1
MT-TY	+1	N	1207	144	1062	1
MT-TY	+2	N	1164	183	980		1
MT-TY	+3	N	1123	1114	8	1
MT-TY	+4	N	380	360	16	4
MT-TY	+5	N	346	329	16		1
MT-TY	+6	N	291	291
MT-TY	+7	N	244	244
MT-TY	+8	N	198	198
MT-TY	+9	N	130	129			1
MT-TY	+10	N	66	66
MT-TY	+11	N	15	15
mt-tRNA	mt-tRNA position	Expected nt	Total read count for position	Read count for A	Read count for C	Read count for G	Read count for T
MT-TC	66	T	70141	1326	3404	84	65327
MT-TC	+1	N	69859	1088	68691	20	60
MT-TC	+2	N	69521	4656	64722	16	127
MT-TC	+3	N	65551	65272	214	35	30
MT-TC	+4	N	1473	1035	329	64	45
MT-TC	+5	N	1194	941	114	19	120
MT-TC	+6	N	926	713	7	143	63
MT-TC	+7	N	865	674	138	8	45
MT-TC	+8	N	718	591	87	35	5
MT-TC	+9	N	386	375	3	2	6
MT-TC	+10	N	252	242	4	4	2
MT-TC	+11	N	128	127			1
mt-tRNA	mt-tRNA position	Expected nt	Total read count for position	Read count for A	Read count for C	Read count for G	Read count for T
MT-TR	65	A	1668	1665	2		1
MT-TR	+1	N	1639	94	1543	1	1
MT-TR	+2	N	1575	25	1549		1
MT-TR	+3	N	1557	1475	81	1
MT-TR	+4	N	130	109	21
MT-TR	+5	N	49	47	2
MT-TR	+6	N	29	28	1
MT-TR	+7	N	20	19	1
MT-TR	+8	N	20	19			1
MT-TR	+9	N	17	16	1
MT-TR	+10	N	6	6
MT-TR	+11	N	4	4
mt-tRNA	mt-tRNA position	Expected nt	Total read count for position	Read count for A	Read count for C	Read count for G	Read count for T
MT-TS2	59	A	12601	12520	59	21	1
MT-TS2	+1	N	12252	3587	8644	2	19
MT-TS2	+2	N	11801	3414	8380	4	3
MT-TS2	+3	N	11065	11031	12	11	11
MT-TS2	+4	N	6206	6134	26	1	45
MT-TS2	+5	N	5917	5839	22	12	44
MT-TS2	+6	N	5260	5240	5	14	1
MT-TS2	+7	N	4153	4139		3	11
MT-TS2	+8	N	2604	2598	1	2	3
MT-TS2	+9	N	1584	1579	5
MT-TS2	+10	N	764	763		1

## Sheet: PDE12--
mt-tRNA	mt-tRNA position	Expected nt	Total read count for position	Read count for A	Read count for C	Read count for G	Read count for T
MT-TL1	75	A	14668	14599	34	20	15
MT-TL1	+1	N	14223	431	13789	1	2
MT-TL1	+2	N	14027	273	13751	1	2
MT-TL1	+3	N	13833	13804	10	11	8
MT-TL1	+4	N	9101	8967	30	4	100
MT-TL1	+5	N	8782	8764	5	7	6
MT-TL1	+6	N	8684	8579	96	4	5
MT-TL1	+7	N	7997	7892	96	4	5
MT-TL1	+8	N	6691	6591	96	4
MT-TL1	+9	N	5314	5310	1	2	1
MT-TL1	+10	N	3908	3813	1	1	93
MT-TL1	+11	N	3096	3001	1	93	1
MT-TL1	+12	N	2017	1924		93
MT-TL1	+13	N	764	764
mt-tRNA	mt-tRNA position	Expected nt	Total read count for position	Read count for A	Read count for C	Read count for G	Read count for T
MT-TN	73	G	33964	655	6	33286	17
MT-TN	+1	N	33752	973	30590	11	2178
MT-TN	+2	N	32716	2855	29828	12	21
MT-TN	+3	N	31331	31299	8	7	17
MT-TN	+4	N	8317	8300	7	7	3
MT-TN	+5	N	5815	5794	7	6	8
MT-TN	+6	N	4564	4543	8	8	5
MT-TN	+7	N	3280	3265	4	5	6
MT-TN	+8	N	2069	2061	2	3	3
MT-TN	+9	N	1311	1303	3	2	3
MT-TN	+10	N	941	937	1	3
MT-TN	+11	N	251	248	1		2
MT-TN	+12	N	155	153	2
MT-TN	+13	N	1	1
mt-tRNA	mt-tRNA position	Expected nt	Total read count for position	Read count for A	Read count for C	Read count for G	Read count for T
MT-TQ	72	G	513	13	409	500
MT-TQ	+1	N	426	16	409	1
MT-TQ	+2	N	390	17	409
MT-TQ	+3	N	172	172	409
MT-TQ	+4	N	14	13	409		1
MT-TQ	+5	N	9	9	409
MT-TQ	+6	N	5	5	409
MT-TQ	+7	N	4	4	409
MT-TQ	+8	N	3	3	409
MT-TQ	+9	N	3	3	409
MT-TQ	+10	N	3	3	409
MT-TQ	+11	N	2	2	409
MT-TQ	+12	N	1	1	409
mt-tRNA	mt-tRNA position	Expected nt	Total read count for position	Read count for A	Read count for C	Read count for G	Read count for T
MT-TF	71	A	4775	4771	2	1	1
MT-TF	+1	N	4737	214	4521	1	1
MT-TF	+2	N	4659	93	4564		2
MT-TF	+3	N	4566	4414	146		6
MT-TF	+4	N	2058	1747	300	10	1
MT-TF	+5	N	1949	1888	27	20	14
MT-TF	+6	N	1883	1865	12	5	1
MT-TF	+7	N	1821	1815	3		3
MT-TF	+8	N	1704	1683	2	16	3
MT-TF	+9	N	1588	1586			2
MT-TF	+10	N	1412	1408		3	1
MT-TF	+11	N	1064	1062		2
MT-TF	+12	N	571	571
mt-tRNA	mt-tRNA position	Expected nt	Total read count for position	Read count for A	Read count for C	Read count for G	Read count for T
MT-TL2	71	A	3615	3609	3	3
MT-TL2	+1	N	3548	219	3329
MT-TL2	+2	N	3431	197	3234
MT-TL2	+3	N	3318	3315		1	2
MT-TL2	+4	N	345	345
MT-TL2	+5	N	331	295	36
MT-TL2	+6	N	286	286
MT-TL2	+7	N	253	209	44
MT-TL2	+8	N	149	105	44
MT-TL2	+9	N	90	88		1	1
MT-TL2	+10	N	18	18
MT-TL2	+11	N	12	12
mt-tRNA	mt-tRNA position	Expected nt	Total read count for position	Read count for A	Read count for C	Read count for G	Read count for T
MT-TK	70	A	51589	51429	98	45	17
MT-TK	+1	N	51447	664	50736	22	25
MT-TK	+2	N	51327	755	50515	22	35
MT-TK	+3	N	51239	51137	76	18	8
MT-TK	+4	N	46667	43091	3493	59	24
MT-TK	+5	N	46470	46237	166	29	38
MT-TK	+6	N	46221	45989	82	21	129
MT-TK	+7	N	45811	45710	84	12	5
MT-TK	+8	N	44995	44830	86	15	64
MT-TK	+9	N	42464	42317	87	38	22
MT-TK	+10	N	35497	35432	25	31	9
MT-TK	+11	N	24915	24892	15	3	5
MT-TK	+12	N	11295	11284	2	3	6
MT-TK	+13	N	3	3
mt-tRNA	mt-tRNA position	Expected nt	Total read count for position	Read count for A	Read count for C	Read count for G	Read count for T
MT-TH	70	C	34789	328	34428	9	24
MT-TH	+1	N	34738	240	34485	2	11
MT-TH	+2	N	34663	311	34331	1	20
MT-TH	+3	N	34631	23257	11311	30	33
MT-TH	+4	N	31140	17030	14058	22	30
MT-TH	+5	N	30984	16667	14238	23	56
MT-TH	+6	N	30867	29987	814	46	20
MT-TH	+7	N	30559	29936	545	37	41
MT-TH	+8	N	30068	29816	220	16	16
MT-TH	+9	N	28949	28834	61	22	32
MT-TH	+10	N	25696	25629	53	10	4
MT-TH	+11	N	15155	15126	25	2	2
MT-TH	+12	N	887	886			1
mt-tRNA	mt-tRNA position	Expected nt	Total read count for position	Read count for A	Read count for C	Read count for G	Read count for T
MT-TV	69	A	52638	52479	40	52	67
MT-TV	+1	N	51900	162	51702	10	26
MT-TV	+2	N	50249	198	50012	8	31
MT-TV	+3	N	49523	49444	31	25	23
MT-TV	+4	N	4872	4138	674	37	23
MT-TV	+5	N	2748	2505	116	20	107
MT-TV	+6	N	2377	2268	53	49	7
MT-TV	+7	N	2070	1910	116	6	38
MT-TV	+8	N	1907	1828	49	28	2
MT-TV	+9	N	1632	1628	1	1	2
MT-TV	+10	N	1319	1310	8	1
MT-TV	+11	N	816	807	7		2
MT-TV	+12	N	109	109
mt-tRNA	mt-tRNA position	Expected nt	Total read count for position	Read count for A	Read count for C	Read count for G	Read count for T
MT-TI	69	A	315	315
MT-TI	+1	N	225	73	151	1
MT-TI	+2	N	211	72	138	1
MT-TI	+3	N	192	192
MT-TI	+4	N	117	116	1
MT-TI	+5	N	116	115			1
MT-TI	+6	N	112	112
MT-TI	+7	N	107	107
MT-TI	+8	N	98	98
MT-TI	+9	N	90	90
MT-TI	+10	N	44	44
MT-TI	+11	N	23	23
mt-tRNA	mt-tRNA position	Expected nt	Total read count for position	Read count for A	Read count for C	Read count for G	Read count for T
MT-TA	69	A	9233	9214	7	8	4
MT-TA	+1	N	9214	54	8727	431	2
MT-TA	+2	N	9203	62	9130	3	8
MT-TA	+3	N	9193	8024	731	4	434
MT-TA	+4	N	6603	6583	5	12	3
MT-TA	+5	N	3685	3677	2	6
MT-TA	+6	N	3677	3674	2		1
MT-TA	+7	N	3534	3533		1
MT-TA	+8	N	3516	3510		3	3
MT-TA	+9	N	2983	2976	4	1	2
MT-TA	+10	N	1680	1676	1	3
MT-TA	+11	N	1232	1230		2
MT-TA	+12	N	226	226
mt-tRNA	mt-tRNA position	Expected nt	Total read count for position	Read count for A	Read count for C	Read count for G	Read count for T
MT-TE	69	A	4292	4281		7	4
MT-TE	+1	N	4286	113	4173
MT-TE	+2	N	4241	69	4123		49
MT-TE	+3	N	4176	4097	22	51	6
MT-TE	+4	N	784	778	1	5
MT-TE	+5	N	738	698		2	38
MT-TE	+6	N	717	680		37
MT-TE	+7	N	672	635			37
MT-TE	+8	N	621	616		4	1
MT-TE	+9	N	544	537			7
MT-TE	+10	N	484	453		10	21
MT-TE	+11	N	437	413	24
MT-TE	+12	N	252	248			4
mt-tRNA	mt-tRNA position	Expected nt	Total read count for position	Read count for A	Read count for C	Read count for G	Read count for T
MT-TS	69	G	41	6		35
MT-TS	+1	N	39	7	32
MT-TS	+2	N	38	6	32
MT-TS	+3	N	37	37
MT-TS	+4	N	5	5
MT-TS	+5	N	3	3
MT-TS	+6	N	3	3
MT-TS	+7	N	3	3
MT-TS	+8	N	3	3
MT-TS	+9	N	2	2
MT-TS	+10	N	1	1
mt-tRNA	mt-tRNA position	Expected nt	Total read count for position	Read count for A	Read count for C	Read count for G	Read count for T
MT-TP	68	A	594	591	1	2
MT-TP	+1	N	584	2	569		13
MT-TP	+2	N	583	16	567
MT-TP	+3	N	583	581	2
MT-TP	+4	N	247	224	22		1
MT-TP	+5	N	246	236	1		9
MT-TP	+6	N	245	244		1
MT-TP	+7	N	244	244
MT-TP	+8	N	243	243
MT-TP	+9	N	216	216
MT-TP	+10	N	147	147
MT-TP	+11	N	78	78
	+12
mt-tRNA	mt-tRNA position	Expected nt	Total read count for position	Read count for A	Read count for C	Read count for G	Read count for T
MT-TM	68	A	42245	42112	34	44	55
MT-TM	+1	N	42054	354	41692	1	7
MT-TM	+2	N	41556	411	41132	6	7
MT-TM	+3	N	40740	40647	49	16	28
MT-TM	+4	N	7089	6254	783	42	10
MT-TM	+5	N	6569	6150	371	10	38
MT-TM	+6	N	6240	5939	270	27	4
MT-TM	+7	N	5928	5544	362	7	15
MT-TM	+8	N	5721	5628	75	15	3
MT-TM	+9	N	5107	5070	27	3	7
MT-TM	+10	N	3975	3951	16	8
MT-TM	+11	N	2277	2272	3	2
mt-tRNA	mt-tRNA position	Expected nt	Total read count for position	Read count for A	Read count for C	Read count for G	Read count for T
MT-TW	68	G	1746	57		1687	2
MT-TW	+1	N	1731	13	1713		5
MT-TW	+2	N	1685	13	1670		2
MT-TW	+3	N	1675	1617	57	1
MT-TW	+4	N	261	191	70
MT-TW	+5	N	210	155	42	9	4
MT-TW	+6	N	195	187	4	4
MT-TW	+7	N	180	146	30		4
MT-TW	+8	N	178	174		4
MT-TW	+9	N	174	155	10		9
MT-TW	+10	N	161	161
MT-TW	+11	N	102	102
mt-tRNA	mt-tRNA position	Expected nt	Total read count for position	Read count for A	Read count for C	Read count for G	Read count for T
MT-TD	68	A	33461	33354	43	33	31
MT-TD	+1	N	33343	200	33110		33
MT-TD	+2	N	33058	248	32795	3	12
MT-TD	+3	N	32749	32641	55	23	30
MT-TD	+4	N	16530	13016	3497	5	12
MT-TD	+5	N	13321	12607	647	31	36
MT-TD	+6	N	8319	8230	48	20	21
MT-TD	+7	N	7217	7064	114	37	2
MT-TD	+8	N	6382	6331	21	5	25
MT-TD	+9	N	5477	5456	2	19
MT-TD	+10	N	4597	4587	1	1	8
MT-TD	+11	N	2615	2614			1
MT-TD	+12	N	1	1
mt-tRNA	mt-tRNA position	Expected nt	Total read count for position	Read count for A	Read count for C	Read count for G	Read count for T
MT-TG	68	A	38876	38790	34	15	37
MT-TG	+1	N	38509	610	37847	36	16
MT-TG	+2	N	38017	640	37357	6	14
MT-TG	+3	N	37457	36985	443	18	11
MT-TG	+4	N	4249	3992	231	1	25
MT-TG	+5	N	4129	3937	142	13	37
MT-TG	+6	N	3982	3839	32	93	18
MT-TG	+7	N	3737	3675	21		41
MT-TG	+8	N	3515	3454	29	12	20
MT-TG	+9	N	3277	3256	1	1	19
MT-TG	+10	N	2746	2724	3		19
MT-TG	+11	N	1694	1671	1	1	21
mt-tRNA	mt-tRNA position	Expected nt	Total read count for position	Read count for A	Read count for C	Read count for G	Read count for T
MT-TT	66	A	2817	2810	2	3	2
MT-TT	+1	N	2815	28	2787
MT-TT	+2	N	2812	35	2774		3
MT-TT	+3	N	2811	2803	2		6
MT-TT	+4	N	1198	1020	176		2
MT-TT	+5	N	1193	1165		28
MT-TT	+6	N	1192	1188	1	2	1
MT-TT	+7	N	1189	1188			1
MT-TT	+8	N	1186	1184		2
MT-TT	+9	N	1156	1156
MT-TT	+10	N	973	973
MT-TT	+11	N	663	663
mt-tRNA	mt-tRNA position	Expected nt	Total read count for position	Read count for A	Read count for C	Read count for G	Read count for T
MT-TY	66	A	543	351	188	1	3
MT-TY	+1	N	449	12	437
MT-TY	+2	N	444	40	403	1
MT-TY	+3	N	433	422	11
MT-TY	+4	N	317	264	53
MT-TY	+5	N	315	309	2		4
MT-TY	+6	N	287	284	2	1
MT-TY	+7	N	259	259
MT-TY	+8	N	204	199			5
MT-TY	+9	N	174	172	1		1
MT-TY	+10	N	116	116
MT-TY	+11	N	50	50
mt-tRNA	mt-tRNA position	Expected nt	Total read count for position	Read count for A	Read count for C	Read count for G	Read count for T
MT-TC	66	T	76545	254	9609	75	66607
MT-TC	+1	N	76383	183	76164	7	29
MT-TC	+2	N	76287	8271	67981	9	26
MT-TC	+3	N	75267	72171	3025	42	29
MT-TC	+4	N	10408	9434	887	11	76
MT-TC	+5	N	9899	8933	841	77	48
MT-TC	+6	N	9780	9274	464	34	8
MT-TC	+7	N	9567	9369	186	5	7
MT-TC	+8	N	9051	8961	79	9	2
MT-TC	+9	N	7642	7639	2		1
MT-TC	+10	N	5466	5445	1	16	4
MT-TC	+11	N	2768	2766	1	1
mt-tRNA	mt-tRNA position	Expected nt	Total read count for position	Read count for A	Read count for C	Read count for G	Read count for T
MT-TR	65	A	478	477	1
MT-TR	+1	N	455	14	441
MT-TR	+2	N	443	3	440
MT-TR	+3	N	435	413	22
MT-TR	+4	N	35	35
MT-TR	+5	N	21	21
MT-TR	+6	N	21	21
MT-TR	+7	N	21	21
MT-TR	+8	N	20	20
MT-TR	+9	N	19	19
MT-TR	+10	N	11	11
MT-TR	+11	N	1	1
mt-tRNA	mt-tRNA position	Expected nt	Total read count for position	Read count for A	Read count for C	Read count for G	Read count for T
MT-TS2	59	A	5754	5672	73	4	5
MT-TS2	+1	N	5688	459	5227		2
MT-TS2	+2	N	5634	860	4769	2	3
MT-TS2	+3	N	5579	5524	44	7	4
MT-TS2	+4	N	4615	4533	66	11	5
MT-TS2	+5	N	4608	4587	8	4	9
MT-TS2	+6	N	4542	4531	10	1
MT-TS2	+7	N	4288	4273	2	4	9
MT-TS2	+8	N	3558	3553	3	2
MT-TS2	+9	N	2698	2688	5		5
MT-TS2	+10	N	1365	1362	2	1

## Sheet: PDE12-- + WT
mt-tRNA	mt-tRNA position	Expected nt	Total read count for position	Read count for A	Read count for C	Read count for G	Read count for T
MT-TL1	75	A	10915	10868	31	9	7
MT-TL1	+1	N	7928	2262	5659	4	3
MT-TL1	+2	N	6596	1563	4995	34	4
MT-TL1	+3	N	5356	5305	7	5	39
MT-TL1	+4	N	2095	1946	53	5	91
MT-TL1	+5	N	1864	1863			1
MT-TL1	+6	N	1713	1711		2
MT-TL1	+7	N	1435	1434	1
MT-TL1	+8	N	1164	1160	1	1	2
MT-TL1	+9	N	790	788	2
MT-TL1	+10	N	624	623	1
MT-TL1	+11	N	520	519			1
MT-TL1	+12	N	367	365		1	1
MT-TL1	+13	N	172	172
mt-tRNA	mt-tRNA position	Expected nt	Total read count for position	Read count for A	Read count for C	Read count for G	Read count for T
MT-TN	73	G	68429	985	1156	66120	168
MT-TN	+1	N	66074	1115	59576	151	5232
MT-TN	+2	N	56308	5173	50938	139	58
MT-TN	+3	N	43764	43324	12	59	369
MT-TN	+4	N	4636	4433	48	9	146
MT-TN	+5	N	3916	3463	41	270	142
MT-TN	+6	N	2755	2597	4	146	8
MT-TN	+7	N	2114	1967	1	8	138
MT-TN	+8	N	1350	1249		5	96
MT-TN	+9	N	919	910	1	5	3
MT-TN	+10	N	728	719	2	1	6
MT-TN	+11	N	692	686		2	4
MT-TN	+12	N	485	483			2
MT-TN	+13	N	1	1
mt-tRNA	mt-tRNA position	Expected nt	Total read count for position	Read count for A	Read count for C	Read count for G	Read count for T
MT-TQ	72	G	4218	26	1	4189	2
MT-TQ	+1	N	4001	30	3971
MT-TQ	+2	N	3787	34	3747		6
MT-TQ	+3	N	2162	2159		2	1
MT-TQ	+4	N	23	18	2	1	2
MT-TQ	+5	N	18	14	2		2
MT-TQ	+6	N	15	15
MT-TQ	+7	N	11	8	1	2
MT-TQ	+8	N	7	6		1
MT-TQ	+9	N	5	3	1	1
MT-TQ	+10	N	4	3		1
MT-TQ	+11	N	3	2		1
MT-TQ	+12	N	2	2
mt-tRNA	mt-tRNA position	Expected nt	Total read count for position	Read count for A	Read count for C	Read count for G	Read count for T
MT-TF	71	A	7780	7775	2	2	1
MT-TF	+1	N	7618	186	7430		2
MT-TF	+2	N	7331	164	7160	1	6
MT-TF	+3	N	5512	5407	52	4	49
MT-TF	+4	N	774	752		19	3
MT-TF	+5	N	700	629	2	36	33
MT-TF	+6	N	647	588		57	2
MT-TF	+7	N	607	564			43
MT-TF	+8	N	541	516		6	19
MT-TF	+9	N	467	452		2	13
MT-TF	+10	N	423	409		13	1
MT-TF	+11	N	327	315		12
MT-TF	+12	N	196	195			1
mt-tRNA	mt-tRNA position	Expected nt	Total read count for position	Read count for A	Read count for C	Read count for G	Read count for T
MT-TL2	71	A	9415	9389	4	12	10
MT-TL2	+1	N	6767	14	6752		1
MT-TL2	+2	N	6549	12	6534		3
MT-TL2	+3	N	4906	4899	2	5
MT-TL2	+4	N	68	67			1
MT-TL2	+5	N	5	3		1	1
MT-TL2	+6	N	5	3		1	1
MT-TL2	+7	N	4	2		1	1
MT-TL2	+8	N	1		1
mt-tRNA	mt-tRNA position	Expected nt	Total read count for position	Read count for A	Read count for C	Read count for G	Read count for T
MT-TK	70	A	67368	66400	853	35	80
MT-TK	+1	N	45972	1108	44747	65	52
MT-TK	+2	N	42417	1107	41223	23	64
MT-TK	+3	N	40987	40857	23	80	27
MT-TK	+4	N	8148	7755	290	61	42
MT-TK	+5	N	7891	7767	3	23	98
MT-TK	+6	N	7790	7634	79	40	37
MT-TK	+7	N	7691	7574	38	39	40
MT-TK	+8	N	7605	7528	6	59	12
MT-TK	+9	N	7312	7255	5	28	24
MT-TK	+10	N	6679	6641	26	4	8
MT-TK	+11	N	5625	5595	1	1	28
MT-TK	+12	N	3417	3413	3		1
MT-TK	+13	N	1	1
mt-tRNA	mt-tRNA position	Expected nt	Total read count for position	Read count for A	Read count for C	Read count for G	Read count for T
MT-TH	70	C	54007	666	53276	35	30
MT-TH	+1	N	47659	694	46937	5	23
MT-TH	+2	N	43408	913	42478	4	13
MT-TH	+3	N	39914	38389	1458	38	29
MT-TH	+4	N	13812	8398	5387	12	15
MT-TH	+5	N	13644	11997	1606	20	21
MT-TH	+6	N	13377	13214	133	23	7
MT-TH	+7	N	13158	13003	134	10	11
MT-TH	+8	N	12758	12706	25	11	16
MT-TH	+9	N	12087	12066	13	1	7
MT-TH	+10	N	10795	10778	9	2	6
MT-TH	+11	N	6969	6957	10	2
MT-TH	+12	N	661	661
mt-tRNA	mt-tRNA position	Expected nt	Total read count for position	Read count for A	Read count for C	Read count for G	Read count for T
MT-TV	69	A	9208	9165	27	7	9
MT-TV	+1	N	7043	72	6967	1	3
MT-TV	+2	N	5175	71	5097	2	5
MT-TV	+3	N	4374	4364	6	2	2
MT-TV	+4	N	98	84	11	2	1
MT-TV	+5	N	83	72	5	1	5
MT-TV	+6	N	74	63	6	4	1
MT-TV	+7	N	64	60	1		3
MT-TV	+8	N	62	58		3	1
MT-TV	+9	N	57	56			1
MT-TV	+10	N	47	46		1
MT-TV	+11	N	33	32			1
MT-TV	+12	N	2	2
mt-tRNA	mt-tRNA position	Expected nt	Total read count for position	Read count for A	Read count for C	Read count for G	Read count for T
MT-TI	69	A	3107	3104	2	1
MT-TI	+1	N	2553	649	1551	352	1
MT-TI	+2	N	2379	689	1337	352	1
MT-TI	+3	N	2010	1814	192	2	2
MT-TI	+4	N	1376	993	381		2
MT-TI	+5	N	1253	975	7		271
MT-TI	+6	N	945	943	2
MT-TI	+7	N	888	881		1	6
MT-TI	+8	N	704	699		5
MT-TI	+9	N	481	479		1	1
MT-TI	+10	N	387	380	2	5
MT-TI	+11	N	332	330		2
MT-TI	+12	N	226	225		1
mt-tRNA	mt-tRNA position	Expected nt	Total read count for position	Read count for A	Read count for C	Read count for G	Read count for T
MT-TA	69	A	18264	18006	249	7	2
MT-TA	+1	N	15931	64	15850	12	5
MT-TA	+2	N	14033	495	13527	3	8
MT-TA	+3	N	11133	11116	4	7	6
MT-TA	+4	N	267	259	1	4	3
MT-TA	+5	N	260	249	2	2	7
MT-TA	+6	N	257	249	3	1	4
MT-TA	+7	N	257	254		2	1
MT-TA	+8	N	252	243	6	2	1
MT-TA	+9	N	242	240		1	1
MT-TA	+10	N	236	233	1	2
MT-TA	+11	N	231	229		1	1
MT-TA	+12	N	199	199
mt-tRNA	mt-tRNA position	Expected nt	Total read count for position	Read count for A	Read count for C	Read count for G	Read count for T
MT-TE	69	A	11363	11347	4	10	2
MT-TE	+1	N	10415	387	10021	2	5
MT-TE	+2	N	9017	389	8602	4	22
MT-TE	+3	N	6960	6929	7	22	2
MT-TE	+4	N	479	444	32	1	2
MT-TE	+5	N	426	405	1	2	18
MT-TE	+6	N	414	392	1	19	2
MT-TE	+7	N	393	373		1	19
MT-TE	+8	N	366	364		1	1
MT-TE	+9	N	352	334	1		17
MT-TE	+10	N	276	259		17
MT-TE	+11	N	180	163	17
MT-TE	+12	N	66	66
mt-tRNA	mt-tRNA position	Expected nt	Total read count for position	Read count for A	Read count for C	Read count for G	Read count for T
MT-TS	69	G	520	9		511
MT-TS	+1	N	517	2	508		7
MT-TS	+2	N	472	2	469	1
MT-TS	+3	N	336	331			5
MT-TS	+4	N	5	5
MT-TS	+5	N	5		5
MT-TS	+6	N	5	5
MT-TS	+7	N	5	5
MT-TS	+8	N	5	5
MT-TS	+9	N	5	5
mt-tRNA	mt-tRNA position	Expected nt	Total read count for position	Read count for A	Read count for C	Read count for G	Read count for T
MT-TP	68	A	3460	3440	16	2	2
MT-TP	+1	N	3283	151	3012	1	119
MT-TP	+2	N	2908	42	2749		117
MT-TP	+3	N	2381	2226	39		116
MT-TP	+4	N	222	178		43	1
MT-TP	+5	N	164	118	1	2	43
MT-TP	+6	N	161	159		2
MT-TP	+7	N	151	149			2
MT-TP	+8	N	120	118		2
MT-TP	+9	N	76	76
MT-TP	+10	N	54	54
MT-TP	+11	N	5	5
mt-tRNA	mt-tRNA position	Expected nt	Total read count for position	Read count for A	Read count for C	Read count for G	Read count for T
MT-TM	68	A	38504	38409	15	56	24
MT-TM	+1	N	33694	167	33444	37	46
MT-TM	+2	N	30343	200	30085	31	27
MT-TM	+3	N	18783	18679	11	27	66
MT-TM	+4	N	1330	1246	29	31	24
MT-TM	+5	N	1260	1191	36	17	16
MT-TM	+6	N	1247	1165	19	30	33
MT-TM	+7	N	1237	1142	24	57	14
MT-TM	+8	N	1169	1090	49	16	14
MT-TM	+9	N	1043	1015	5	5	18
MT-TM	+10	N	826	816	5	3	2
MT-TM	+11	N	449	441	3		5
MT-TM	+12	N	1	1
mt-tRNA	mt-tRNA position	Expected nt	Total read count for position	Read count for A	Read count for C	Read count for G	Read count for T
MT-TW	68	G	6346	227	1	6115	3
MT-TW	+1	N	6319	43	6257		19
MT-TW	+2	N	6066	50	6015	1
MT-TW	+3	N	5421	5406	15
MT-TW	+4	N	169	153	16
MT-TW	+5	N	154	141		13
MT-TW	+6	N	132	130		2
MT-TW	+7	N	125	123	2
MT-TW	+8	N	95	95
MT-TW	+9	N	78	77	1
MT-TW	+10	N	73	73
MT-TW	+11	N	33	33
mt-tRNA	mt-tRNA position	Expected nt	Total read count for position	Read count for A	Read count for C	Read count for G	Read count for T
MT-TD	68	A	44353	44225	24	53	51
MT-TD	+1	N	41993	749	41235	4	5
MT-TD	+2	N	40795	640	40140	2	13
MT-TD	+3	N	38604	38484	79	19	22
MT-TD	+4	N	1355	1237	109	1	8
MT-TD	+5	N	1175	1124	1	11	39
MT-TD	+6	N	875	764	24	84	3
MT-TD	+7	N	695	642	2	28	23
MT-TD	+8	N	546	519	3	4	20
MT-TD	+9	N	501	500	1
MT-TD	+10	N	331	331
MT-TD	+11	N	142	142
mt-tRNA	mt-tRNA position	Expected nt	Total read count for position	Read count for A	Read count for C	Read count for G	Read count for T
MT-TG	68	A	77528	77462	38	13	15
MT-TG	+1	N	53347	370	52944	1	32
MT-TG	+2	N	47907	311	47547	9	40
MT-TG	+3	N	32601	32470	60	43	28
MT-TG	+4	N	955	881	52	2	20
MT-TG	+5	N	822	756	29	6	31
MT-TG	+6	N	794	769	1	10	14
MT-TG	+7	N	786	764	2	13	7
MT-TG	+8	N	751	734	11	3	3
MT-TG	+9	N	684	679	2	3
MT-TG	+10	N	609	606	2	1
MT-TG	+11	N	300	300
mt-tRNA	mt-tRNA position	Expected nt	Total read count for position	Read count for A	Read count for C	Read count for G	Read count for T
MT-TT	66	A	9597	9577	1	16	3
MT-TT	+1	N	9441	464	8962	14	1
MT-TT	+2	N	9338	474	8858	6
MT-TT	+3	N	7986	7811	5	6	164
MT-TT	+4	N	722	564	158
MT-TT	+5	N	538	537	1
MT-TT	+6	N	494	338	156
MT-TT	+7	N	403	403
MT-TT	+8	N	325	171	154
MT-TT	+9	N	299	298	1
MT-TT	+10	N	117	117
MT-TT	+11	N	99	99
mt-tRNA	mt-tRNA position	Expected nt	Total read count for position	Read count for A	Read count for C	Read count for G	Read count for T
MT-TY	66	A	509	498	7	4
MT-TY	+1	N	421	199	220	1	1
MT-TY	+2	N	391	195	195	1
MT-TY	+3	N	363	359	1	3
MT-TY	+4	N	233	231	1	1
MT-TY	+5	N	219	218	1
MT-TY	+6	N	203	201	1	1
MT-TY	+7	N	182	182
MT-TY	+8	N	133	130	3
MT-TY	+9	N	69	68	1
MT-TY	+10	N	34	34
MT-TY	+11	N	14	14
mt-tRNA	mt-tRNA position	Expected nt	Total read count for position	Read count for A	Read count for C	Read count for G	Read count for T
MT-TC	66	T	43005	11999	16473	44	14489
MT-TC	+1	N	34236	230	33926	44	36
MT-TC	+2	N	29910	9319	20522	23	46
MT-TC	+3	N	17104	16877	140	42	45
MT-TC	+4	N	760	634	60	5	61
MT-TC	+5	N	679	590	26	10	53
MT-TC	+6	N	615	556	25	15	19
MT-TC	+7	N	576	564	2	3	7
MT-TC	+8	N	546	535	5	6
MT-TC	+9	N	526	523	1	2
MT-TC	+10	N	465	459	4	2
MT-TC	+11	N	380	376	4
mt-tRNA	mt-tRNA position	Expected nt	Total read count for position	Read count for A	Read count for C	Read count for G	Read count for T
MT-TR	65	A	1999	1543	456
MT-TR	+1	N	1645	62	1581	1	1
MT-TR	+2	N	1361	337	1010	1	13
MT-TR	+3	N	848	798	36	13	1
MT-TR	+4	N	49	37	12
MT-TR	+5	N	13	1	12
MT-TR	+6	N	13	1	12
MT-TR	+7	N	12	12
MT-TR	+8	N	12	12
MT-TR	+9	N	12	12
mt-tRNA	mt-tRNA position	Expected nt	Total read count for position	Read count for A	Read count for C	Read count for G	Read count for T
MT-TS2	59	A	26515	26467	5	19	24
MT-TS2	+1	N	25391	23692	1605	73	21
MT-TS2	+2	N	24159	22657	1458	40	4
MT-TS2	+3	N	22551	22523	7	5	16
MT-TS2	+4	N	19668	19634	7	21	6
MT-TS2	+5	N	16496	16457	20	4	15
MT-TS2	+6	N	12575	12558	6	4	7
MT-TS2	+7	N	8935	8900	23	12
MT-TS2	+8	N	5852	5826	8	6	12
MT-TS2	+9	N	3680	3671	2	4	3
MT-TS2	+10	N	1657	1654	1	2

## Sheet: PDE12-- + E351A
mt-tRNA	mt-tRNA position	Expected nt	Total read count for position	Read count for A	Read count for C	Read count for G	Read count for T
MT-TL1	75	A	12914	12850	24	23	17
MT-TL1	+1	N	12598	299	12297		2
MT-TL1	+2	N	12420	249	12163	3	5
MT-TL1	+3	N	12340	12294	8	8	30
MT-TL1	+4	N	10130	9929	170	4	27
MT-TL1	+5	N	9709	9641	23	39	6
MT-TL1	+6	N	9447	9380	58	5	4
MT-TL1	+7	N	8538	8504	31	1	2
MT-TL1	+8	N	6706	6678	25	2	1
MT-TL1	+9	N	5356	5351		2	3
MT-TL1	+10	N	3925	3918	1	2	4
MT-TL1	+11	N	2643	2635		5	3
MT-TL1	+12	N	1725	1719		4	2
MT-TL1	+13	N	780	779	1
mt-tRNA	mt-tRNA position	Expected nt	Total read count for position	Read count for A	Read count for C	Read count for G	Read count for T
MT-TN	73	G	89566	9327	2173	78002	64
MT-TN	+1	N	89049	10522	56629	32	21866
MT-TN	+2	N	88193	30791	57331	40	31
MT-TN	+3	N	85380	84109	1110	39	122
MT-TN	+4	N	51530	49659	1513	243	115
MT-TN	+5	N	42181	41064	486	239	392
MT-TN	+6	N	35252	34867	346	33	6
MT-TN	+7	N	28272	28200	32	29	11
MT-TN	+8	N	23552	23383	141	15	13
MT-TN	+9	N	17947	17935	6	4	2
MT-TN	+10	N	13837	13821	6	5	5
MT-TN	+11	N	8595	8581	3	7	4
MT-TN	+12	N	4068	4061	1	2	4
MT-TN	+13	N	1	1
mt-tRNA	mt-tRNA position	Expected nt	Total read count for position	Read count for A	Read count for C	Read count for G	Read count for T
MT-TQ	72	G	9468	2932		6534	2
MT-TQ	+1	N	9123	2984	6122	12	5
MT-TQ	+2	N	8900	2730	6162	3	5
MT-TQ	+3	N	8172	8157	11	2	2
MT-TQ	+4	N	3012	2679	199	1	133
MT-TQ	+5	N	2052	2046	2	2	2
MT-TQ	+6	N	1409	1402	1	5	1
MT-TQ	+7	N	1145	1130		10	5
MT-TQ	+8	N	849	840	3	6
MT-TQ	+9	N	690	683	1	6
MT-TQ	+10	N	595	590		5
MT-TQ	+11	N	188	183		4	1
MT-TQ	+12	N	110	108		1	1
mt-tRNA	mt-tRNA position	Expected nt	Total read count for position	Read count for A	Read count for C	Read count for G	Read count for T
MT-TF	71	A	22331	22277	21	15	18
MT-TF	+1	N	22202	694	21477	11	20
MT-TF	+2	N	22110	211	21862	17	20
MT-TF	+3	N	21923	21177	708	10	28
MT-TF	+4	N	17440	14878	2520	31	11
MT-TF	+5	N	16902	16614	210	36	42
MT-TF	+6	N	16522	16442	34	34	12
MT-TF	+7	N	16035	15950	48	7	30
MT-TF	+8	N	15410	15358	27	9	16
MT-TF	+9	N	14465	14451	6	3	5
MT-TF	+10	N	12887	12861	14	10	2
MT-TF	+11	N	9934	9907	12	12	3
MT-TF	+12	N	5502	5499	1		2
mt-tRNA	mt-tRNA position	Expected nt	Total read count for position	Read count for A	Read count for C	Read count for G	Read count for T
MT-TL2	71	A	6669	6628	3	4	34
MT-TL2	+1	N	6520	750	5769	1
MT-TL2	+2	N	6395	687	5660		48
MT-TL2	+3	N	6265	6233	30	2
MT-TL2	+4	N	1702	1625	76		1
MT-TL2	+5	N	1333	1313	18	1	1
MT-TL2	+6	N	1083	1061	19	3
MT-TL2	+7	N	973	939	30	2	2
MT-TL2	+8	N	753	749	1	2	1
MT-TL2	+9	N	511	510		1
MT-TL2	+10	N	323	321	1	1
MT-TL2	+11	N	156	156
mt-tRNA	mt-tRNA position	Expected nt	Total read count for position	Read count for A	Read count for C	Read count for G	Read count for T
MT-TK	70	A	91401	91109	174	89	29
MT-TK	+1	N	91245	1199	89978	30	38
MT-TK	+2	N	90860	1376	89407	29	48
MT-TK	+3	N	90593	90389	142	34	28
MT-TK	+4	N	77548	73428	4054	25	41
MT-TK	+5	N	77093	76606	291	56	140
MT-TK	+6	N	76816	76585	115	78	38
MT-TK	+7	N	76380	76043	204	29	104
MT-TK	+8	N	75500	75232	205	28	35
MT-TK	+9	N	73696	73469	117	27	83
MT-TK	+10	N	68058	67935	73	24	26
MT-TK	+11	N	55512	55434	49	10	19
MT-TK	+12	N	32438	32402	28	6	2
MT-TK	+13	N	2	2
mt-tRNA	mt-tRNA position	Expected nt	Total read count for position	Read count for A	Read count for C	Read count for G	Read count for T
MT-TH	70	C	99232	828	98325	11	68
MT-TH	+1	N	99157	622	98479	6	50
MT-TH	+2	N	99067	881	98136	13	37
MT-TH	+3	N	98963	94341	4479	73	70
MT-TH	+4	N	96009	51858	44023	45	83
MT-TH	+5	N	95140	87539	7341	73	187
MT-TH	+6	N	93405	92035	1227	68	75
MT-TH	+7	N	91843	90822	864	79	78
MT-TH	+8	N	89227	88970	185	30	42
MT-TH	+9	N	84809	84674	91	20	24
MT-TH	+10	N	75182	75050	100	15	17
MT-TH	+11	N	46092	46001	80	8	3
MT-TH	+12	N	2353	2352	1
mt-tRNA	mt-tRNA position	Expected nt	Total read count for position	Read count for A	Read count for C	Read count for G	Read count for T
MT-TV	69	A	33173	33022	20	72	59
MT-TV	+1	N	32935	125	32772	18	20
MT-TV	+2	N	31361	178	31159	6	18
MT-TV	+3	N	30845	30759	33	23	30
MT-TV	+4	N	5222	4597	562	24	39
MT-TV	+5	N	2798	2653	62	19	64
MT-TV	+6	N	2460	2353	57	36	14
MT-TV	+7	N	2245	2192	20	10	23
MT-TV	+8	N	2053	2000	21	14	18
MT-TV	+9	N	1753	1736	8	8	1
MT-TV	+10	N	1296	1287	4	1	4
MT-TV	+11	N	758	756		2
MT-TV	+12	N	69	69
mt-tRNA	mt-tRNA position	Expected nt	Total read count for position	Read count for A	Read count for C	Read count for G	Read count for T
MT-TI	69	A	12413	12398	5	10
MT-TI	+1	N	11761	5235	5385	1138	3
MT-TI	+2	N	11362	5302	5193	864	3
MT-TI	+3	N	11109	11100	5	3	1
MT-TI	+4	N	7231	6164	1062	4	1
MT-TI	+5	N	6697	6322	4	7	364
MT-TI	+6	N	5867	5690	174	1	2
MT-TI	+7	N	5236	4747	173	8	308
MT-TI	+8	N	4325	4309	1	15
MT-TI	+9	N	3716	3706	1	6	3
MT-TI	+10	N	3082	3064	1	15	2
MT-TI	+11	N	2310	2305	2	2	1
MT-TI	+12	N	1277	1277
mt-tRNA	mt-tRNA position	Expected nt	Total read count for position	Read count for A	Read count for C	Read count for G	Read count for T
MT-TA	69	A	51021	50488	127	401	5
MT-TA	+1	N	50643	1647	48653	332	11
MT-TA	+2	N	49587	1320	48240	4	23
MT-TA	+3	N	49169	48792	19	24	334
MT-TA	+4	N	20203	19323	795	73	12
MT-TA	+5	N	17007	16898	20	16	73
MT-TA	+6	N	15436	15347	7	14	68
MT-TA	+7	N	15078	15063	5	4	6
MT-TA	+8	N	13537	13496	35	5	1
MT-TA	+9	N	12069	12061	3	2	3
MT-TA	+10	N	9434	9417	5	12
MT-TA	+11	N	6351	6348	2		1
MT-TA	+12	N	2845	2844	1
mt-tRNA	mt-tRNA position	Expected nt	Total read count for position	Read count for A	Read count for C	Read count for G	Read count for T
MT-TE	69	A	13284	13271	4	8	1
MT-TE	+1	N	13230	265	12960	1	4
MT-TE	+2	N	13103	248	12789	3	63
MT-TE	+3	N	12918	12842	15	51	10
MT-TE	+4	N	6895	6566	320	7	2
MT-TE	+5	N	6392	6316	14	7	55
MT-TE	+6	N	6114	6015	30	53	16
MT-TE	+7	N	5934	5883	1	1	49
MT-TE	+8	N	5728	5723		5
MT-TE	+9	N	5321	5303		2	16
MT-TE	+10	N	4573	4556	1	14	2
MT-TE	+11	N	3515	3498	17
MT-TE	+12	N	1938	1930	7		1
mt-tRNA	mt-tRNA position	Expected nt	Total read count for position	Read count for A	Read count for C	Read count for G	Read count for T
MT-TS	69	G	5949	3549	205	2188	7
MT-TS	+1	N	5776	3158	2191	2	425
MT-TS	+2	N	5488	3036	2440	11	1
MT-TS	+3	N	4926	4483	61	3	379
MT-TS	+4	N	2911	2841	59	7	4
MT-TS	+5	N	2464	2186	4	274
MT-TS	+6	N	2139	2126	11	1	1
MT-TS	+7	N	1816	1596	2		218
MT-TS	+8	N	1508	1407	1		100
MT-TS	+9	N	1176	1155		2	19
MT-TS	+10	N	906	897		1	8
MT-TS	+11	N	568	566		1	1
MT-TS	+12	N	251	248	1	1	1
mt-tRNA	mt-tRNA position	Expected nt	Total read count for position	Read count for A	Read count for C	Read count for G	Read count for T
MT-TP	68	A	10752	10685	39	16	12
MT-TP	+1	N	10745	51	10572	1	121
MT-TP	+2	N	10669	117	10485	2	65
MT-TP	+3	N	10523	10375	87	2	59
MT-TP	+4	N	5092	4827	237	28
MT-TP	+5	N	3896	3860	5	1	30
MT-TP	+6	N	3453	3400	32	3	18
MT-TP	+7	N	3008	2971	33	3	1
MT-TP	+8	N	2896	2863	20	1	12
MT-TP	+9	N	2490	2488			2
MT-TP	+10	N	1725	1720	3	1	1
MT-TP	+11	N	770	770
mt-tRNA	mt-tRNA position	Expected nt	Total read count for position	Read count for A	Read count for C	Read count for G	Read count for T
MT-TM	68	A	56304	56004	98	100	102
MT-TM	+1	N	55989	591	55369	14	15
MT-TM	+2	N	54947	685	54219	7	36
MT-TM	+3	N	54307	54108	134	30	35
MT-TM	+4	N	41692	40281	1326	46	39
MT-TM	+5	N	41259	40879	297	26	57
MT-TM	+6	N	40947	40489	365	43	50
MT-TM	+7	N	40537	39946	505	33	53
MT-TM	+8	N	39868	39497	306	40	25
MT-TM	+9	N	37918	37846	15	19	38
MT-TM	+10	N	32547	32481	38	8	20
MT-TM	+11	N	20586	20564	11	7	4
MT-TM	+12	N	7	7
mt-tRNA	mt-tRNA position	Expected nt	Total read count for position	Read count for A	Read count for C	Read count for G	Read count for T
MT-TW	68	G	16934	382	1	16543	8
MT-TW	+1	N	16886	299	16491	1	95
MT-TW	+2	N	16729	393	16324	3	9
MT-TW	+3	N	16526	15596	921	3	6
MT-TW	+4	N	7478	6165	1290	15	8
MT-TW	+5	N	7079	6808	240	26	5
MT-TW	+6	N	6744	6534	205	5
MT-TW	+7	N	6574	6437	134	1	2
MT-TW	+8	N	6366	6359	6		1
MT-TW	+9	N	6120	6112	6		2
MT-TW	+10	N	5299	5294	3		2
MT-TW	+11	N	3132	3132
MT-TW	+12	N	1	1
mt-tRNA	mt-tRNA position	Expected nt	Total read count for position	Read count for A	Read count for C	Read count for G	Read count for T
MT-TD	68	A	25243	25080	107	23	33
MT-TD	+1	N	24818	621	24157	16	24
MT-TD	+2	N	23532	664	22827	9	32
MT-TD	+3	N	23011	22928	45	21	17
MT-TD	+4	N	7597	6605	966	23	3
MT-TD	+5	N	6844	6589	232	16	7
MT-TD	+6	N	6363	6318	30	7	8
MT-TD	+7	N	5853	5784	53	13	3
MT-TD	+8	N	5388	5351	16	16	5
MT-TD	+9	N	4881	4842	37	1	1
MT-TD	+10	N	4135	4124	9	1	1
MT-TD	+11	N	2805	2804			1
mt-tRNA	mt-tRNA position	Expected nt	Total read count for position	Read count for A	Read count for C	Read count for G	Read count for T
MT-TG	68	A	94954	94667	109	82	96
MT-TG	+1	N	94654	708	93881	26	39
MT-TG	+2	N	94186	988	93143	12	43
MT-TG	+3	N	93317	92311	949	36	21
MT-TG	+4	N	62885	59838	2945	66	36
MT-TG	+5	N	62286	61433	586	113	154
MT-TG	+6	N	62004	61629	157	132	86
MT-TG	+7	N	61597	61304	92	30	171
MT-TG	+8	N	60906	60718	84	44	60
MT-TG	+9	N	58758	58695	27	13	23
MT-TG	+10	N	50486	50432	45	3	6
MT-TG	+11	N	31486	31448	30	2	6
MT-TG	+12	N	7	7
mt-tRNA	mt-tRNA position	Expected nt	Total read count for position	Read count for A	Read count for C	Read count for G	Read count for T
MT-TT	66	A	21634	21603	6	14	11
MT-TT	+1	N	21605	280	21314	5	6
MT-TT	+2	N	21603	341	21255	2	5
MT-TT	+3	N	21537	21441	63	20	13
MT-TT	+4	N	19034	14968	4009	48	9
MT-TT	+5	N	18554	18255	274	15	10
MT-TT	+6	N	18228	18126	83	11	8
MT-TT	+7	N	17767	17669	54	7	37
MT-TT	+8	N	17091	17062	6	4	19
MT-TT	+9	N	15977	15966	4	2	5
MT-TT	+10	N	13295	13278	11	2	4
MT-TT	+11	N	7797	7794		1	2
MT-TT	+12	N	3	3
mt-tRNA	mt-tRNA position	Expected nt	Total read count for position	Read count for A	Read count for C	Read count for G	Read count for T
MT-TY	65	C	2071	111	1958		2
MT-TY	+1	A	1538	1409	124	1	4
MT-TY	+2	N	1499	139	1358	2
MT-TY	+3	N	1467	167	1300
MT-TY	+4	N	1439	1401	32	4	2
MT-TY	+5	N	1176	1111	64	1
MT-TY	+6	N	1148	1142	4		2
MT-TY	+7	N	1058	1050	7	1
MT-TY	+8	N	925	924		1
MT-TY	+9	N	805	801	2	2
MT-TY	+10	N	662	659		3
MT-TY	+11	N	458	457		1
MT-TY	+12	N	225	225
mt-tRNA	mt-tRNA position	Expected nt	Total read count for position	Read count for A	Read count for C	Read count for G	Read count for T
MT-TC	66	T	92497	948	36565	75	54909
MT-TC	+1	N	92416	446	91927	12	31
MT-TC	+2	N	92385	35426	56818	32	109
MT-TC	+3	N	91263	78976	12169	67	51
MT-TC	+4	N	40012	38868	965	80	99
MT-TC	+5	N	39318	36867	2314	42	95
MT-TC	+6	N	38586	36633	1754	132	67
MT-TC	+7	N	37657	37150	437	19	51
MT-TC	+8	N	36132	35977	83	64	8
MT-TC	+9	N	32554	32532	11	4	7
MT-TC	+10	N	24732	24702	12	11	7
MT-TC	+11	N	13580	13568	2	7	3
MT-TC	+12	N	12	12
mt-tRNA	mt-tRNA position	Expected nt	Total read count for position	Read count for A	Read count for C	Read count for G	Read count for T
MT-TR	65	A	6925	6903	19	3
MT-TR	+1	N	6832	340	6488		4
MT-TR	+2	N	6610	66	6541	1	2
MT-TR	+3	N	6440	6036	375	3	26
MT-TR	+4	N	1423	1112	241	50	20
MT-TR	+5	N	753	691	1	44	17
MT-TR	+6	N	638	602	34	1	1
MT-TR	+7	N	563	562			1
MT-TR	+8	N	528	527		1
MT-TR	+9	N	505	505
MT-TR	+10	N	383	383
MT-TR	+11	N	180	180
mt-tRNA	mt-tRNA position	Expected nt	Total read count for position	Read count for A	Read count for C	Read count for G	Read count for T
MT-TS2	59	A	7909	7863	33	4	9
MT-TS2	+1	N	7840	2114	5721	1	4
MT-TS2	+2	N	7794	2896	4891	3	4
MT-TS2	+3	N	7718	7630	52	5	31
MT-TS2	+4	N	7141	7058	53	1	29
MT-TS2	+5	N	7057	7024	8	7	18
MT-TS2	+6	N	6890	6870	8	5	7
MT-TS2	+7	N	6396	6384	9	3
MT-TS2	+8	N	5318	5308		9	1
MT-TS2	+9	N	4037	4036	1
MT-TS2	+10	N	2304	2297	2	5

## Sheet: PDE12++ + MTPAP 
mt-tRNA	mt-tRNA position	Expected nt	Total read count for position	Read count for A	Read count for C	Read count for G	Read count for T
MT-TL1	75	A	4762	4729	8	16	9
MT-TL1	+1	N	4600	106	4494
MT-TL1	+2	N	4599	99	4498	1	1
MT-TL1	+3	N	4363	4354	1	6	2
MT-TL1	+4	N	3672	3665	4	1	2
MT-TL1	+5	N	3646	3644	1	1
MT-TL1	+6	N	3510	3364	1		145
MT-TL1	+7	N	3375	3372	2	1
MT-TL1	+8	N	3103	3100	1	1	1
MT-TL1	+9	N	2039	2038		1
MT-TL1	+10	N	1856	1854			2
MT-TL1	+11	N	1354	1353		1
MT-TL1	+12	N	474	473		1
MT-TL1	+13	N	145	145
mt-tRNA	mt-tRNA position	Expected nt	Total read count for position	Read count for A	Read count for C	Read count for G	Read count for T
MT-TN	73	G	15535	920	6	14602	7
MT-TN	+1	N	15515	1427	13471	7	610
MT-TN	+2	N	14509	1548	12951	2	8
MT-TN	+3	N	14468	14451	4	8	5
MT-TN	+4	N	2313	2300	5	1	7
MT-TN	+5	N	2287	2283	2		2
MT-TN	+6	N	1807	1795	3	1	8
MT-TN	+7	N	1037	1029	5	1	2
MT-TN	+8	N	963	955			8
MT-TN	+9	N	219	212		6	1
MT-TN	+10	N	183	177			6
MT-TN	+11	N	172	166		4	2
MT-TN	+12	N	141	140			1
mt-tRNA	mt-tRNA position	Expected nt	Total read count for position	Read count for A	Read count for C	Read count for G	Read count for T
MT-TQ	72	G	792	5		787
MT-TQ	+1	N	792	5	786		1
MT-TQ	+2	N	792	10	782
MT-TQ	+3	N	791	791
MT-TQ	+4	N	2	2
MT-TQ	+5	N	1	1
MT-TQ	+6	N	1	1
mt-tRNA	mt-tRNA position	Expected nt	Total read count for position	Read count for A	Read count for C	Read count for G	Read count for T
MT-TF	71	A	4933	4927	3	1	2
MT-TF	+1	N	4816	118	4698
MT-TF	+2	N	4757	136	4620		1
MT-TF	+3	N	4669	4551	113	2	3
MT-TF	+4	N	2029	1991	35	3
MT-TF	+5	N	1850	1847	2	1
MT-TF	+6	N	1713	1709	1	2	1
MT-TF	+7	N	1709	1703	2	3	1
MT-TF	+8	N	1655	1654			1
MT-TF	+9	N	1420	1418		1	1
MT-TF	+10	N	1104	1080	1	23
MT-TF	+11	N	676	675		1
MT-TF	+12	N	319	318			1
mt-tRNA	mt-tRNA position	Expected nt	Total read count for position	Read count for A	Read count for C	Read count for G	Read count for T
MT-TL2	71	A	625	625
MT-TL2	+1	N	511	2	509
MT-TL2	+2	N	511	3	508
MT-TL2	+3	N	510	508		1	1
MT-TL2	+4	N	3	3
MT-TL2	+5	N	3	3
MT-TL2	+6	N	3	3
MT-TL2	+7	N	2	1	1
MT-TL2	+8	N	1		1
MT-TL2	+9	N	1	1
	+10
mt-tRNA	mt-tRNA position	Expected nt	Total read count for position	Read count for A	Read count for C	Read count for G	Read count for T
MT-TK	70	A	4862	4855	3	4
MT-TK	+1	N	4073	313	3757	1	2
MT-TK	+2	N	3895	222	3655	1	17
MT-TK	+3	N	3758	3741	4	6	7
MT-TK	+4	N	1461	1447	4		10
MT-TK	+5	N	1439	1413		12	14
MT-TK	+6	N	1436	1421	1	13	1
MT-TK	+7	N	1424	1409	1	1	13
MT-TK	+8	N	1370	1357		13
MT-TK	+9	N	1252	1252
MT-TK	+10	N	955	941			14
MT-TK	+11	N	695	681		14
MT-TK	+12	N	433	421			12
mt-tRNA	mt-tRNA position	Expected nt	Total read count for position	Read count for A	Read count for C	Read count for G	Read count for T
MT-TH	70	C	16226	500	15722		4
MT-TH	+1	N	14847	572	14272	1	2
MT-TH	+2	N	14129	578	13549	1	1
MT-TH	+3	N	13589	13523	38	16	12
MT-TH	+4	N	1230	910	318	2
MT-TH	+5	N	1170	1017	147	5	1
MT-TH	+6	N	1107	1102	4		1
MT-TH	+7	N	1092	1090	1	1
MT-TH	+8	N	1065	1064		1
MT-TH	+9	N	996	995			1
MT-TH	+10	N	785	785
MT-TH	+11	N	441	441
MT-TH	+12	N	41	40		1
MT-TH	+13	N	1	1
mt-tRNA	mt-tRNA position	Expected nt	Total read count for position	Read count for A	Read count for C	Read count for G	Read count for T
MT-TV	69	A	96462	96079	145	122	116
MT-TV	+1	N	87419	675	86724	5	15
MT-TV	+2	N	79721	283	79397	4	37
MT-TV	+3	N	78142	78044	35	40	23
MT-TV	+4	N	1409	1035	250	93	31
MT-TV	+5	N	1034	646		14	374
MT-TV	+6	N	891	577	92	222
MT-TV	+7	N	665	449	1		215
MT-TV	+8	N	590	374	3	211	2
MT-TV	+9	N	308	308
MT-TV	+10	N	209	208			1
MT-TV	+11	N	88	88
MT-TV	+12	N	10	10
mt-tRNA	mt-tRNA position	Expected nt	Total read count for position	Read count for A	Read count for C	Read count for G	Read count for T
MT-TI	69	A	1373	1370		1	2
MT-TI	+1	N	1229	376	850	2	1
MT-TI	+2	N	1184	472	711	1
MT-TI	+3	N	1091	1089	1		1
MT-TI	+4	N	752	750		1	1
MT-TI	+5	N	674	673			1
MT-TI	+6	N	611	609		1	1
MT-TI	+7	N	584	584
MT-TI	+8	N	433	432			1
MT-TI	+9	N	406	403	1	1	1
MT-TI	+10	N	322	322
MT-TI	+11	N	264	264
MT-TI	+12	N	140	140
mt-tRNA	mt-tRNA position	Expected nt	Total read count for position	Read count for A	Read count for C	Read count for G	Read count for T
MT-TA	69	A	27114	27089	9	8	8
MT-TA	+1	N	27108	255	26844	3	6
MT-TA	+2	N	26935	109	26816	4	6
MT-TA	+3	N	26911	26868	14	19	10
MT-TA	+4	N	11023	11000	3	12	8
MT-TA	+5	N	6127	6116	3	4	4
MT-TA	+6	N	5820	5810	2	7	1
MT-TA	+7	N	5818	5816	1	1
MT-TA	+8	N	5813	5809	2	2
MT-TA	+9	N	5795	5791	1	2	1
MT-TA	+10	N	5457	5457
MT-TA	+11	N	5231	5229	1		1
MT-TA	+12	N	3008	3006			2
mt-tRNA	mt-tRNA position	Expected nt	Total read count for position	Read count for A	Read count for C	Read count for G	Read count for T
MT-TE	69	A	1339	1334		3	2
MT-TE	+1	N	1291	38	1252	1
MT-TE	+2	N	1244	43	1201
MT-TE	+3	N	1204	1181	20	2	1
MT-TE	+4	N	830	829			1
MT-TE	+5	N	799	783		2	14
MT-TE	+6	N	798	783		14	1
MT-TE	+7	N	782	780	1	1
MT-TE	+8	N	780	780
MT-TE	+9	N	737	736	1
MT-TE	+10	N	665	664	1
MT-TE	+11	N	476	476
MT-TE	+12	N	232	232
mt-tRNA	mt-tRNA position	Expected nt	Total read count for position	Read count for A	Read count for C	Read count for G	Read count for T
MT-TS	69	G	84	23		61
MT-TS	+1	N	83	24	59
MT-TS	+2	N	73	20	53
MT-TS	+3	N	49	49
MT-TS	+4	N	15	15
MT-TS	+5	N	8	8
MT-TS	+6	N	8	8
MT-TS	+7	N	7	7
MT-TS	+8	N	7	7
MT-TS	+9	N	7	7
MT-TS	+10	N	5	5
MT-TS	+11	N	2	2
mt-tRNA	mt-tRNA position	Expected nt	Total read count for position	Read count for A	Read count for C	Read count for G	Read count for T
MT-TP	68	A	490	489			1
MT-TP	+1	N	486	11	470		5
MT-TP	+2	N	486	11	471		4
MT-TP	+3	N	486	486
MT-TP	+4	N	424	423	1
MT-TP	+5	N	420	419	1
MT-TP	+6	N	411	410			1
MT-TP	+7	N	411	411
MT-TP	+8	N	394	394
MT-TP	+9	N	321	321
MT-TP	+10	N	215	215
MT-TP	+11	N	108	108
mt-tRNA	mt-tRNA position	Expected nt	Total read count for position	Read count for A	Read count for C	Read count for G	Read count for T
MT-TM	68	A	46556	46433	14	57	52
MT-TM	+1	N	46099	141	45950	2	6
MT-TM	+2	N	45466	157	45299		10
MT-TM	+3	N	44432	44268	127	17	20
MT-TM	+4	N	1437	1435	2
MT-TM	+5	N	1204	985	162	32	25
MT-TM	+6	N	1101	1045	1	25	30
MT-TM	+7	N	1036	873	139		24
MT-TM	+8	N	863	770	68	24	1
MT-TM	+9	N	654	623	1	30
MT-TM	+10	N	348	298	20	30
MT-TM	+11	N	207	206			1
MT-TM	+12	N	9	9
mt-tRNA	mt-tRNA position	Expected nt	Total read count for position	Read count for A	Read count for C	Read count for G	Read count for T
MT-TW	68	G	950	8	1	940	1
MT-TW	+1	N	949	12	935		2
MT-TW	+2	N	947	24	923
MT-TW	+3	N	913	911	2
MT-TW	+4	N	162	143	19
MT-TW	+5	N	155	135	20
MT-TW	+6	N	155	155
MT-TW	+7	N	143	143
MT-TW	+8	N	142	142
MT-TW	+9	N	123	123
MT-TW	+10	N	121	121
MT-TW	+11	N	54	54
mt-tRNA	mt-tRNA position	Expected nt	Total read count for position	Read count for A	Read count for C	Read count for G	Read count for T
MT-TD	68	A	2883	2860	5	15	3
MT-TD	+1	N	2764	164	2600
MT-TD	+2	N	2633	120	2513
MT-TD	+3	N	2547	2544	2		1
MT-TD	+4	N	384	357	3	24
MT-TD	+5	N	344	329	1		14
MT-TD	+6	N	255	240		15
MT-TD	+7	N	207	194		1	12
MT-TD	+8	N	164	164
MT-TD	+9	N	139	139
MT-TD	+10	N	99	99
MT-TD	+11	N	58	58
mt-tRNA	mt-tRNA position	Expected nt	Total read count for position	Read count for A	Read count for C	Read count for G	Read count for T
MT-TG	68	A	24117	24079	4	27	7
MT-TG	+1	N	20692	164	20515	1	12
MT-TG	+2	N	20352	126	20175	3	48
MT-TG	+3	N	19957	19928	8	12	9
MT-TG	+4	N	1171	1167	1	2	1
MT-TG	+5	N	1086	1027		2	57
MT-TG	+6	N	1040	984		56
MT-TG	+7	N	1031	981	1		49
MT-TG	+8	N	978	973	3		2
MT-TG	+9	N	882	882
MT-TG	+10	N	638	637	1
MT-TG	+11	N	352	352
mt-tRNA	mt-tRNA position	Expected nt	Total read count for position	Read count for A	Read count for C	Read count for G	Read count for T
MT-TT	66	A	1385	1384		1
MT-TT	+1	N	1382	9	1372	1
MT-TT	+2	N	1382	8	1374
MT-TT	+3	N	1380	1379			1
MT-TT	+4	N	939	936	3
MT-TT	+5	N	939	938	1
MT-TT	+6	N	938	938
MT-TT	+7	N	844	843	1
MT-TT	+8	N	793	793
MT-TT	+9	N	666	666
MT-TT	+10	N	559	559
MT-TT	+11	N	340	340
mt-tRNA	mt-tRNA position	Expected nt	Total read count for position	Read count for A	Read count for C	Read count for G	Read count for T
MT-TY	65	C	152	2	149	1
MT-TY	+1	A	85	85
MT-TY	+2	N	55	3	52
MT-TY	+3	N	54	2	52
MT-TY	+4	N	54	54
MT-TY	+5	N	41	37	4
MT-TY	+6	N	35	35
MT-TY	+7	N	20	20
MT-TY	+8	N	17	17
MT-TY	+9	N	14	14
MT-TY	+10	N	14	14
MT-TY	+11	N	9	9
MT-TY	+12	N	5	5
mt-tRNA	mt-tRNA position	Expected nt	Total read count for position	Read count for A	Read count for C	Read count for G	Read count for T
MT-TC	66	T	46504	1707	3503	49	41245
MT-TC	+1	N	45963	355	45486	102	20
MT-TC	+2	N	45898	4147	41615	113	23
MT-TC	+3	N	42607	42450	66	53	38
MT-TC	+4	N	1829	1732	96	1
MT-TC	+5	N	1618	1596	10	3	9
MT-TC	+6	N	1524	1510	2	10	2
MT-TC	+7	N	1436	1429	4		3
MT-TC	+8	N	1252	1246	4	2
MT-TC	+9	N	1204	1200			4
MT-TC	+10	N	1079	1076			3
MT-TC	+11	N	831	830			1
mt-tRNA	mt-tRNA position	Expected nt	Total read count for position	Read count for A	Read count for C	Read count for G	Read count for T
MT-TR	65	A	138	137		1
MT-TR	+1	N	137	29	108
MT-TR	+2	N	126	18	108
MT-TR	+3	N	126	126
MT-TR	+4	N	21	21
MT-TR	+5	N	21	21
MT-TR	+6	N	20	20
MT-TR	+7	N	19	19
MT-TR	+8	N	18	18
MT-TR	+9	N	5	5
MT-TR	+10	N	1	1
MT-TR	+11	N	1	1
mt-tRNA	mt-tRNA position	Expected nt	Total read count for position	Read count for A	Read count for C	Read count for G	Read count for T
MT-TS2	59	A	2799	2795		4
MT-TS2	+1	N	2702	1256	1445		1
MT-TS2	+2	N	2641	1365	1276
MT-TS2	+3	N	2475	2459	13	2	1
MT-TS2	+4	N	1422	1414	1	2	5
MT-TS2	+5	N	1328	1268		39	21
MT-TS2	+6	N	1301	1279	1	21
MT-TS2	+7	N	1131	1110			21
MT-TS2	+8	N	863	841	1	20	1
MT-TS2	+9	N	460	458	1		1
MT-TS2	+10	N	185	184	1

## Sheet: PDE12-- + MTPAP
mt-tRNA	mt-tRNA position	Expected nt	Total read count for position	Read count for A	Read count for C	Read count for G	Read count for T
MT-TL1	75	A	23356	23203	74	46	33
MT-TL1	+1	N	23302	431	22861	2	8
MT-TL1	+2	N	23198	321	22871	2	4
MT-TL1	+3	N	22758	22695	23	31	9
MT-TL1	+4	N	22087	22037	13	22	15
MT-TL1	+5	N	21658	21615	15	15	13
MT-TL1	+6	N	20312	20277	8	15	12
MT-TL1	+7	N	17185	17173	6	3	3
MT-TL1	+8	N	13573	13560	4	7	2
MT-TL1	+9	N	10517	10512	3	1	1
MT-TL1	+10	N	8110	8107	3
MT-TL1	+11	N	5909	5902	5	2
MT-TL1	+12	N	3622	3618	2	1	1
MT-TL1	+13	N	1552	1552
mt-tRNA	mt-tRNA position	Expected nt	Total read count for position	Read count for A	Read count for C	Read count for G	Read count for T
MT-TN	73	G	48555	476	13	48026	40
MT-TN	+1	N	48360	440	40814	29	7077
MT-TN	+2	N	47335	4135	43158	22	20
MT-TN	+3	N	44562	44519	11	19	13
MT-TN	+4	N	36463	35118	1324	11	10
MT-TN	+5	N	31833	31797	10	18	8
MT-TN	+6	N	28816	28785	11	13	7
MT-TN	+7	N	26639	26604	6	14	15
MT-TN	+8	N	20688	20670	8	7	3
MT-TN	+9	N	16067	16057	3	5	2
MT-TN	+10	N	10957	10948	1	3	5
MT-TN	+11	N	9911	9906	3	1	1
MT-TN	+12	N	5289	5284	4	1
MT-TN	+13	N	1	1
mt-tRNA	mt-tRNA position	Expected nt	Total read count for position	Read count for A	Read count for C	Read count for G	Read count for T
MT-TQ	72	G	68	59		9
MT-TQ	+1	N	66	59	7
MT-TQ	+2	N	65	58	7
MT-TQ	+3	N	62	62
MT-TQ	+4	N	56	56
MT-TQ	+5	N	54	54
MT-TQ	+6	N	53	53
MT-TQ	+7	N	53	53
MT-TQ	+8	N	52	52
MT-TQ	+9	N	49	49
MT-TQ	+10	N	48	48
MT-TQ	+11	N	41	41
MT-TQ	+12	N	27	27
mt-tRNA	mt-tRNA position	Expected nt	Total read count for position	Read count for A	Read count for C	Read count for G	Read count for T
MT-TF	71	A	13715	13699	10	4	2
MT-TF	+1	N	13685	315	13362	2	6
MT-TF	+2	N	13649	178	13463	3	5
MT-TF	+3	N	12281	11835	434	4	8
MT-TF	+4	N	11072	10864	153	51	4
MT-TF	+5	N	10828	10649	172	4	3
MT-TF	+6	N	10573	10542	8	3	20
MT-TF	+7	N	10278	10270	4	2	2
MT-TF	+8	N	9817	9733	81	1	2
MT-TF	+9	N	9188	9132	3	1	52
MT-TF	+10	N	7941	7848	42	49	2
MT-TF	+11	N	5851	5842	5	3	1
MT-TF	+12	N	3011	3007	3	1
mt-tRNA	mt-tRNA position	Expected nt	Total read count for position	Read count for A	Read count for C	Read count for G	Read count for T
MT-TL2	71	A	1189	1186		3
MT-TL2	+1	N	1189	8	1181
MT-TL2	+2	N	1189	4	1185
MT-TL2	+3	N	1042	1041		1
MT-TL2	+4	N	126	126
MT-TL2	+5	N	126	126
MT-TL2	+6	N	123	123
MT-TL2	+7	N	101	101
MT-TL2	+8	N	4	4
MT-TL2	+9	N	3	3
MT-TL2	+10	N	2	2
MT-TL2	+11	N	1	1
mt-tRNA	mt-tRNA position	Expected nt	Total read count for position	Read count for A	Read count for C	Read count for G	Read count for T
MT-TK	70	A	7117	7013	75	6	23
MT-TK	+1	N	7095	187	6895	4	9
MT-TK	+2	N	7088	275	6805	2	6
MT-TK	+3	N	7045	7031	6	5	3
MT-TK	+4	N	6934	6892	36	3	3
MT-TK	+5	N	6917	6897	2	3	15
MT-TK	+6	N	6896	6858	5	4	29
MT-TK	+7	N	6881	6863	4	5	9
MT-TK	+8	N	6814	6809	3		2
MT-TK	+9	N	6661	6657	3	1
MT-TK	+10	N	6210	6203	3	4
MT-TK	+11	N	5131	5126	3	2
MT-TK	+12	N	3215	3210	4		1
mt-tRNA	mt-tRNA position	Expected nt	Total read count for position	Read count for A	Read count for C	Read count for G	Read count for T
MT-TH	70	C	46174	679	45471	4	20
MT-TH	+1	N	45975	401	45481	78	15
MT-TH	+2	N	45864	657	45185	5	17
MT-TH	+3	N	43412	39265	4038	61	48
MT-TH	+4	N	39841	23297	16472	26	46
MT-TH	+5	N	39431	34394	4982	40	15
MT-TH	+6	N	38936	38287	519	115	15
MT-TH	+7	N	38177	37860	188	119	10
MT-TH	+8	N	37091	36876	86	87	42
MT-TH	+9	N	35252	35140	22	6	84
MT-TH	+10	N	30557	30511	35	1	10
MT-TH	+11	N	19618	19573	38	5	2
MT-TH	+12	N	1234	1233	1
MT-TH	+13	N	2	2
mt-tRNA	mt-tRNA position	Expected nt	Total read count for position	Read count for A	Read count for C	Read count for G	Read count for T
MT-TV	69	A	98339	98081	30	144	84
MT-TV	+1	N	97607	237	97313	39	18
MT-TV	+2	N	88698	374	88302	3	19
MT-TV	+3	N	81005	80874	33	47	51
MT-TV	+4	N	21037	19639	1322	67	9
MT-TV	+5	N	16231	15629	458	39	105
MT-TV	+6	N	15261	15120	72	67	2
MT-TV	+7	N	14431	14122	248	4	57
MT-TV	+8	N	13629	13362	235	20	12
MT-TV	+9	N	12293	12185	66	40	2
MT-TV	+10	N	10470	10417	47	2	4
MT-TV	+11	N	7890	7858	23	6	3
MT-TV	+12	N	4651	4645	3	3
mt-tRNA	mt-tRNA position	Expected nt	Total read count for position	Read count for A	Read count for C	Read count for G	Read count for T
MT-TI	69	A	185	185
MT-TI	+1	N	184	176	5	3
MT-TI	+2	N	179	172	5	2
MT-TI	+3	N	173	172	1
MT-TI	+4	N	156	154	2
MT-TI	+5	N	116	115			1
MT-TI	+6	N	44	43	1
MT-TI	+7	N	22	20	1		1
MT-TI	+8	N	15	15
MT-TI	+9	N	11	9			2
MT-TI	+10	N	8	7		1
MT-TI	+11	N	7	6		1
MT-TI	+12	N	2	2
mt-tRNA	mt-tRNA position	Expected nt	Total read count for position	Read count for A	Read count for C	Read count for G	Read count for T
MT-TA	69	A	29529	29497	11	8	13
MT-TA	+1	N	29032	134	28882	6	10
MT-TA	+2	N	29024	171	28844	6	3
MT-TA	+3	N	26756	26703	16	25	12
MT-TA	+4	N	18396	18358	15	10	13
MT-TA	+5	N	14104	14079	5	14	6
MT-TA	+6	N	14096	14078	4	8	6
MT-TA	+7	N	13826	13813	2	9	2
MT-TA	+8	N	11483	11472	4	6	1
MT-TA	+9	N	10447	9398	1046	2	1
MT-TA	+10	N	8717	8714	1	2
MT-TA	+11	N	7190	7189		1
MT-TA	+12	N	2970	2968	2
mt-tRNA	mt-tRNA position	Expected nt	Total read count for position	Read count for A	Read count for C	Read count for G	Read count for T
MT-TE	69	A	6927	6908	7	7	5
MT-TE	+1	N	6925	33	6888		4
MT-TE	+2	N	6849	28	6818	2	1
MT-TE	+3	N	6740	6729	4	5	2
MT-TE	+4	N	6524	6513	5	2	4
MT-TE	+5	N	6358	6276	5	3	74
MT-TE	+6	N	6145	6057	4	76	8
MT-TE	+7	N	6030	5886	69		75
MT-TE	+8	N	5874	5869	2	1	2
MT-TE	+9	N	5643	5640	1		2
MT-TE	+10	N	5053	5047	5	1
MT-TE	+11	N	4054	4052	2
MT-TE	+12	N	2239	2238	1
mt-tRNA	mt-tRNA position	Expected nt	Total read count for position	Read count for A	Read count for C	Read count for G	Read count for T
MT-TS	69	G	62	52	5	5
MT-TS	+1	N	61	51	10
MT-TS	+2	N	59	53	6
MT-TS	+3	N	53	53
MT-TS	+4	N	39	39
MT-TS	+5	N	37	37
MT-TS	+6	N	36	36
MT-TS	+7	N	31	31
MT-TS	+8	N	20	20
MT-TS	+9	N	16	16
MT-TS	+10	N	10	10
MT-TS	+11	N	6	6
MT-TS	+12	N	4	4
mt-tRNA	mt-tRNA position	Expected nt	Total read count for position	Read count for A	Read count for C	Read count for G	Read count for T
MT-TP	68	A	1223	1220		1	2
MT-TP	+1	N	1223	10	1207		6
MT-TP	+2	N	1218	12	1206
MT-TP	+3	N	1212	1211			1
MT-TP	+4	N	1146	1123	23
MT-TP	+5	N	1071	1070			1
MT-TP	+6	N	1023	1023
MT-TP	+7	N	1019	1019
MT-TP	+8	N	993	993
MT-TP	+9	N	838	838
MT-TP	+10	N	708	708
MT-TP	+11	N	429	429
mt-tRNA	mt-tRNA position	Expected nt	Total read count for position	Read count for A	Read count for C	Read count for G	Read count for T
MT-TM	68	A	33823	33691	41	35	56
MT-TM	+1	N	33756	262	33486	4	4
MT-TM	+2	N	32662	330	32260	3	69
MT-TM	+3	N	29731	29559	86	72	14
MT-TM	+4	N	18750	18399	279	5	67
MT-TM	+5	N	18675	18594	8	68	5
MT-TM	+6	N	18237	18153	17	8	59
MT-TM	+7	N	17492	17389	77	6	20
MT-TM	+8	N	16723	16689	8	15	11
MT-TM	+9	N	15721	15706	9	3	3
MT-TM	+10	N	13669	13659	5	2	3
MT-TM	+11	N	9429	9424	4		1
MT-TM	+12	N	9	9
mt-tRNA	mt-tRNA position	Expected nt	Total read count for position	Read count for A	Read count for C	Read count for G	Read count for T
MT-TW	68	G	3114	22	18	3073	1
MT-TW	+1	N	3090	9	3078	1	2
MT-TW	+2	N	3072	39	3031		2
MT-TW	+3	N	2370	2245	124		1
MT-TW	+4	N	2082	2007	74		1
MT-TW	+5	N	2072	2035	36	1
MT-TW	+6	N	2065	2023	42
MT-TW	+7	N	2063	2022	41
MT-TW	+8	N	2046	2043	2	1
MT-TW	+9	N	1873	1871	1	1
MT-TW	+10	N	1643	1643
MT-TW	+11	N	982	980	2
MT-TW	+12	N	1	1
mt-tRNA	mt-tRNA position	Expected nt	Total read count for position	Read count for A	Read count for C	Read count for G	Read count for T
MT-TD	68	A	2242	2231	8		3
MT-TD	+1	N	2210	46	2163	1
MT-TD	+2	N	2169	58	2111
MT-TD	+3	N	2106	2103		3
MT-TD	+4	N	1877	1834	40	2	1
MT-TD	+5	N	1802	1790	5	6	1
MT-TD	+6	N	1603	1600	2		1
MT-TD	+7	N	1564	1559	4	1
MT-TD	+8	N	1434	1433		1
MT-TD	+9	N	1239	1233	1	4	1
MT-TD	+10	N	1062	1062
MT-TD	+11	N	708	705	1	1	1
mt-tRNA	mt-tRNA position	Expected nt	Total read count for position	Read count for A	Read count for C	Read count for G	Read count for T
MT-TG	68	A	13997	13981	4	5	7
MT-TG	+1	N	13926	182	13738	1	5
MT-TG	+2	N	13721	144	13571	2	4
MT-TG	+3	N	11778	11667	98	5	8
MT-TG	+4	N	6408	6393	7	2	6
MT-TG	+5	N	6324	6312	3	6	3
MT-TG	+6	N	6310	6249	52	5	4
MT-TG	+7	N	6287	6281	3	2	1
MT-TG	+8	N	6095	6086	3	1	5
MT-TG	+9	N	5447	5444	3
MT-TG	+10	N	4293	4291		1	1
MT-TG	+11	N	1582	1580	2
MT-TG	+12	N	3	3
mt-tRNA	mt-tRNA position	Expected nt	Total read count for position	Read count for A	Read count for C	Read count for G	Read count for T
MT-TT	66	A	5834	5827	4	3
MT-TT	+1	N	5826	52	5772	1	1
MT-TT	+2	N	5824	65	5756	2	1
MT-TT	+3	N	5733	5721	9	2	1
MT-TT	+4	N	5336	5190	142	1	3
MT-TT	+5	N	5332	5320	3	8	1
MT-TT	+6	N	5303	5279	3	18	3
MT-TT	+7	N	5099	5017	31	50	1
MT-TT	+8	N	5057	5050		2	5
MT-TT	+9	N	4715	4714			1
MT-TT	+10	N	3995	3991	3	1
MT-TT	+11	N	2572	2568	2	1	1
mt-tRNA	mt-tRNA position	Expected nt	Total read count for position	Read count for A	Read count for C	Read count for G	Read count for T
MT-TY	65	C	355	4	351
MT-TY	+1	A	306	286	15	5
MT-TY	+2	N	288	10	277	1
MT-TY	+3	N	284	13	271
MT-TY	+4	N	260	259			1
MT-TY	+5	N	217	215	2
MT-TY	+6	N	207	205	2
MT-TY	+7	N	187	186		1
MT-TY	+8	N	157	157
MT-TY	+9	N	137	137
MT-TY	+10	N	115	115
MT-TY	+11	N	84	84
MT-TY	+12	N	49	49
mt-tRNA	mt-tRNA position	Expected nt	Total read count for position	Read count for A	Read count for C	Read count for G	Read count for T
MT-TC	66	T	63453	1487	31589	42	30335
MT-TC	+1	N	63438	932	62477	17	12
MT-TC	+2	N	63154	30825	32262	25	42
MT-TC	+3	N	60499	53439	6994	41	25
MT-TC	+4	N	35809	35374	389	35	11
MT-TC	+5	N	35387	34726	193	333	135
MT-TC	+6	N	34774	34386	235	138	15
MT-TC	+7	N	33685	33537	9	13	126
MT-TC	+8	N	32246	32227	8	9	2
MT-TC	+9	N	27462	27452	4	2	4
MT-TC	+10	N	21573	21565	2	3	3
MT-TC	+11	N	12728	12717	4	2	5
mt-tRNA	mt-tRNA position	Expected nt	Total read count for position	Read count for A	Read count for C	Read count for G	Read count for T
MT-TR	65	A	194	194
MT-TR	+1	N	183	9	174
MT-TR	+2	N	183	2	181
MT-TR	+3	N	135	134	1
MT-TR	+4	N	59	59
MT-TR	+5	N	58	58
MT-TR	+6	N	58	58
MT-TR	+7	N	57	57
MT-TR	+8	N	57	57
MT-TR	+9	N	57	57
MT-TR	+10	N	56	56
MT-TR	+11	N	41	41
mt-tRNA	mt-tRNA position	Expected nt	Total read count for position	Read count for A	Read count for C	Read count for G	Read count for T
MT-TS2	59	A	256	251	5
MT-TS2	+1	N	251	191	60
MT-TS2	+2	N	237	180	57
MT-TS2	+3	N	194	193	1
MT-TS2	+4	N	183	182	1
MT-TS2	+5	N	180	178	1	1
MT-TS2	+6	N	173	173
MT-TS2	+7	N	161	161
MT-TS2	+8	N	131	131
MT-TS2	+9	N	99	99
MT-TS2	+10	N	56	56
