# Supplementary material for: Maturation of selected human mitochondrial tRNAs requires deadenylation
Source: eLife journal article supplement (doi:10.7554/elife.27596), 2017-07-26

**A***PDE12* gene locus - Chr. 3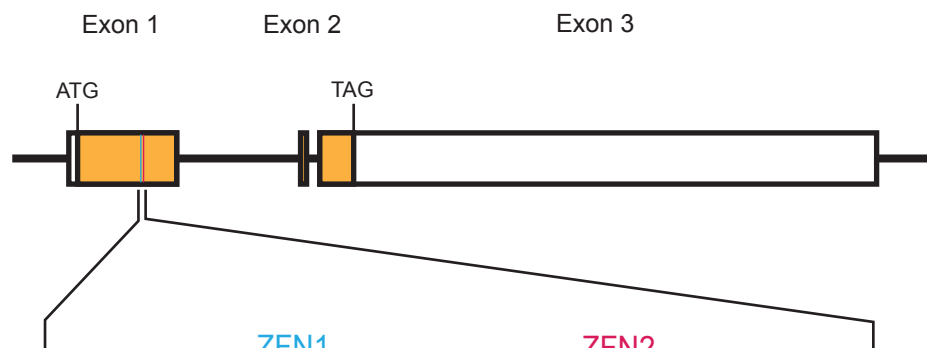

Wild-type

cacttttgacccaccggcatctctacacgaagaaggtgactgaggaccgctctca  
 ZFN1 ZFN2

Clone 71 allele 1 cacttttgaccaccggcatctc**TA**tacacgaagaaggtgactgaggacgctct +2 -/-  
 Clone 71 allele 2 cacttttgaccaccggcatctc-----t**g**aggacgctct -17 -/-  
 Clone 118 allele 1 cacttttgaccaccggcatctct**ACACT**tacacgaagaaggtgactgaggacgc +5 +/-  
 Clone 118 allele 2 wt

**E**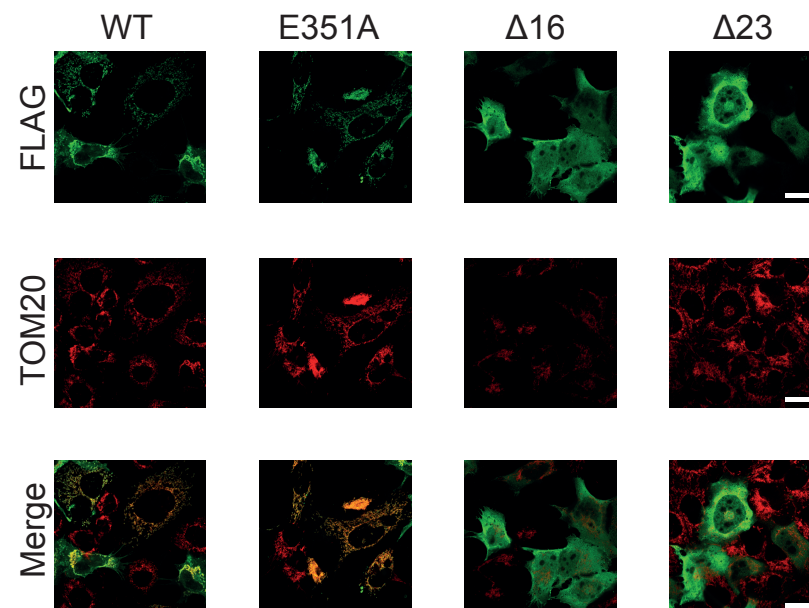**B**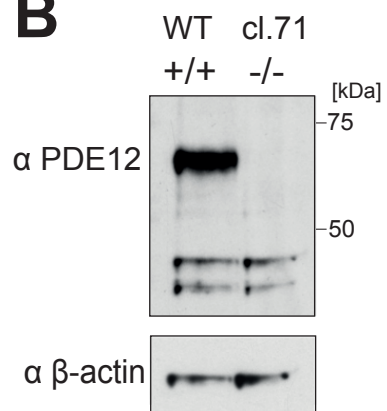**C**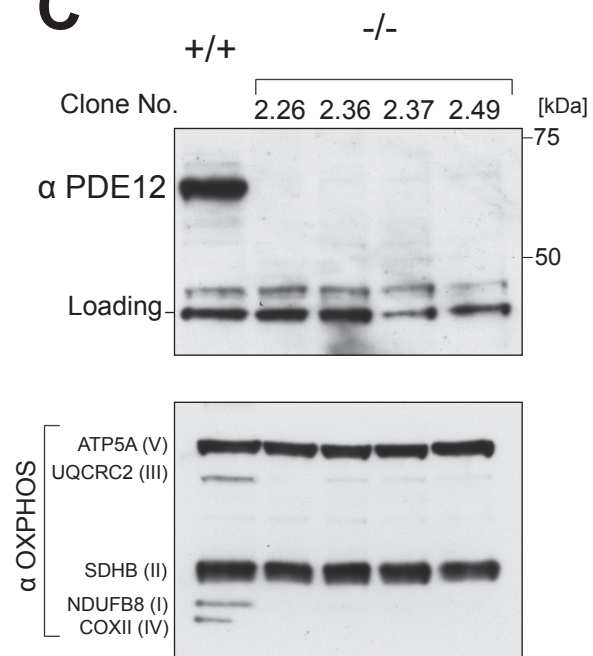**D**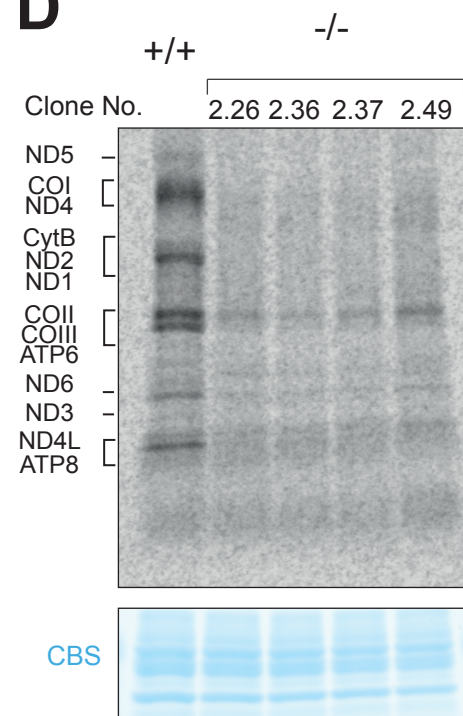**F**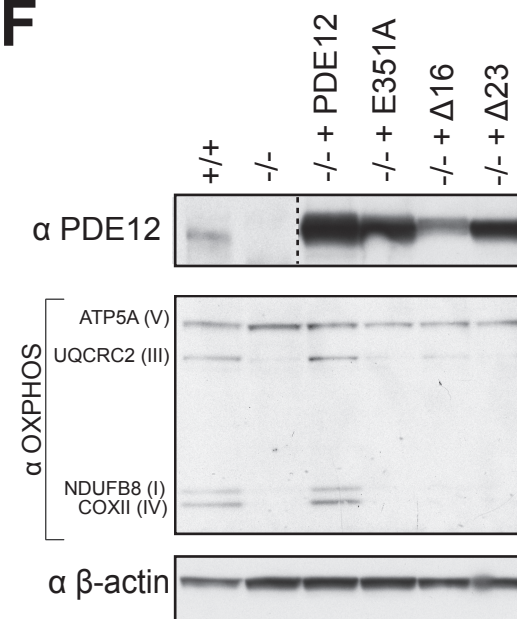

Supplement: supp [file elife_poa_e27596_Figure_1_figure_supplement_1.pdf › elife_poa_e27596_Figure_1_figure_supplement_1.pdf]
