# Supplementary material for: Maturation of selected human mitochondrial tRNAs requires deadenylation
Source: eLife. 2017 Jul 26;6:e27596. doi: 10.7554/eLife.27596 (PMC5544427; doi:10.7554/eLife.27596)
Supplement: Supplementary file 1. — DOI: http://dx.doi.org/10.7554/eLife.27596.017 [file elife-27596-supp1.xlsx]

## Sheet: Table S1
Supplementary File 1 | Distribution of non-encoded extensions on the mature 3’ terminus of mt-rRNA in control cells (+/+), PDE12 -/- cells, and PDE12-/- cells expressing either wild-type PDE12 or PDE12 E351A mutant determined by cRT-PCR.
16S		+/+	-/-	-/- + WT	-/-+E351A
Length of extension	Sequences	% of extensions
0	-	2	0	3.1	2
1	A	2	5.7	9.4	11.8
2	AA/GA	8.2	3.8	0	7.8
3	AAA/GTA/GAA	6.1	7.5	6.3	7.8
4	AAAA/GTTA/AACA	42.9	11.3	56.3	9.8
5	AAAAA/GTTAA/ GCAAA/GAAAA	22.4	7.5	15.6	5.9
6	AAAAAA/GAAAAA/ GTAAAA/GTTAAA	8.2	3.8	6.3	2
7	AAAAAAA/ GTTAAAA/ GTTAAGA/ GTTAACA/ GAAAAAA/ GATAAAA	6.1	11.3	0	13.7
8	AAAAAAAA/ GTTAAAAA	2	3.8	3.1	2
9	AAAAAAAAAA/ GTTAAAAAA/ GAAAAAAAA/ GTAAAAAAA	0	9.4	0	9.8
10	AAAAAAAAAAA/ GTTAAAAAAA	0	13.2	0	3.9
11	AAAAAAAAAAAA/ GTTAAAAAAAA	0	5.7	0	11.8
12	AAAAAAAAAAAAA/ GTTAAAAAAAAA	0	0	0	7.8
13	AAAAAAAAAAAAAA/ GTTAAAAAAAAAA	0	5.7	0	3.9
14	AAAAAAAAAAAAAAA/ GTTAAAAAAAAAAA	0	3.8	0	0
15	GTTAAAAAAAAAAAA	0	5.7	0	0
16	-	0	0	0	0
17	GTTAAAAAAAAAAAAAAA	0	1.9	0	0
12S		+/+	-/-	-/- + WT	-/-+E351A
Length of extension	Sequences	% of extensions
0	-	42.8258	69.8795	53.7855	50
1	A	14.2388	9.4195	0	3.83772
2	AA	7.11939	11.2815	0	15.3509
3	AAA/ACA	21.4677	7.5575	15.4574	15.3509
4	AAAA	9.52903	0	11.5142	9.64912
5	AAAAA	2.40964	0	0	3.83772
6	AAAAAA	2.40964	0	15.4574	1.97368
7	AAAAAAA	0	0	0	0
8	AAAAAAAA	0	0	3.78549	0
9	AAAAAAAAA	0	1.86199	0	0
