# Supplementary figures and images for: Maturation of selected human mitochondrial tRNAs requires deadenylation
Source: eLife journal article supplement (doi:10.7554/elife.27596), 2017-07-26

**A**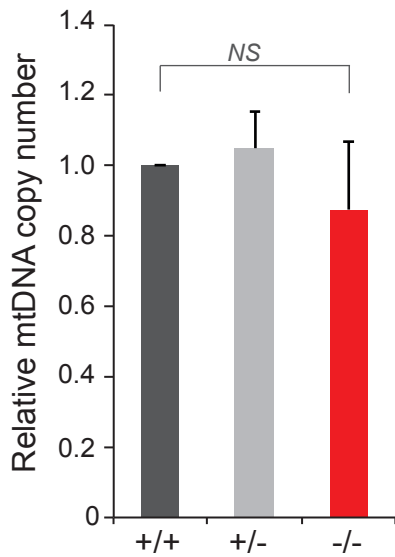**B**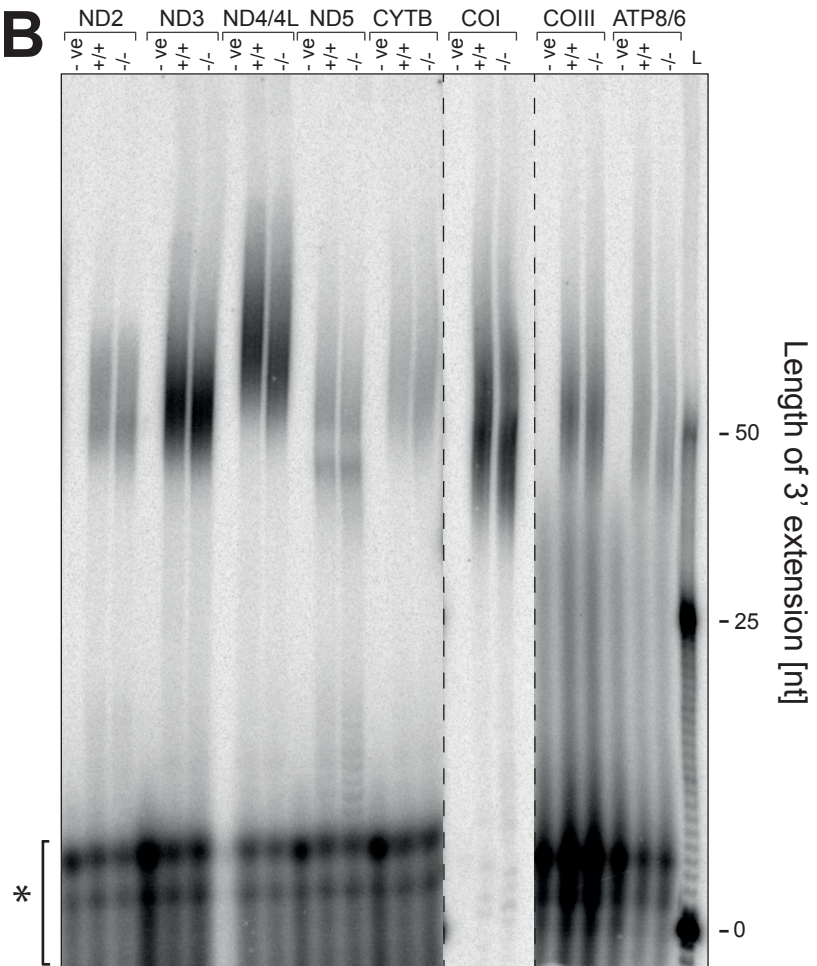**C**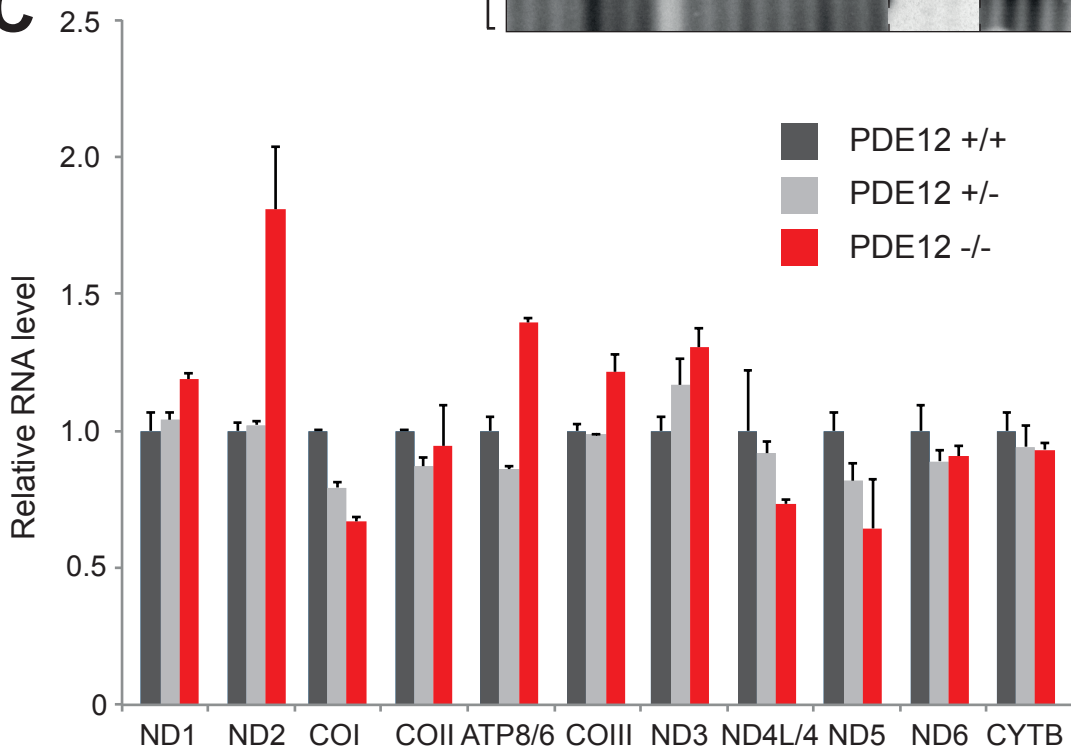

Supplement: supp [file elife_poa_e27596_Figure_2_fgure_supplement_1.pdf › elife_poa_e27596_Figure_2_fgure_supplement_1.pdf]

**A**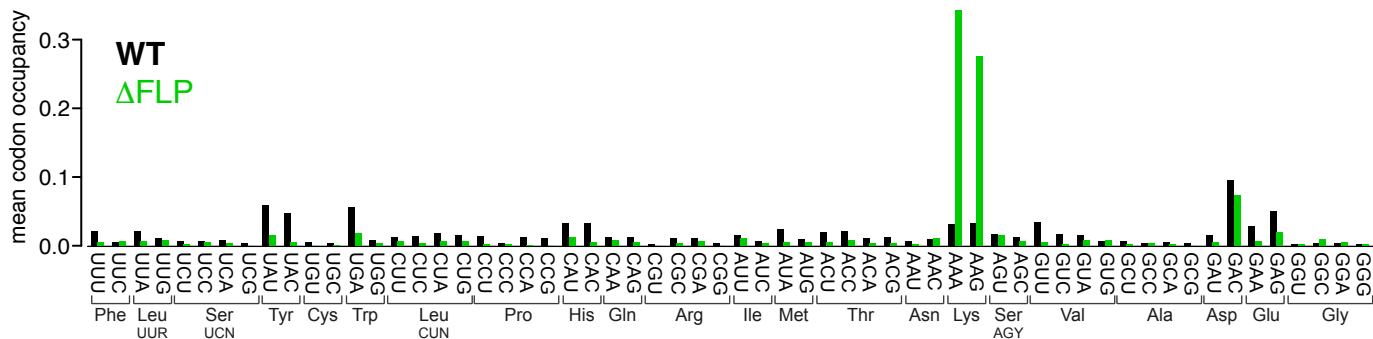**B**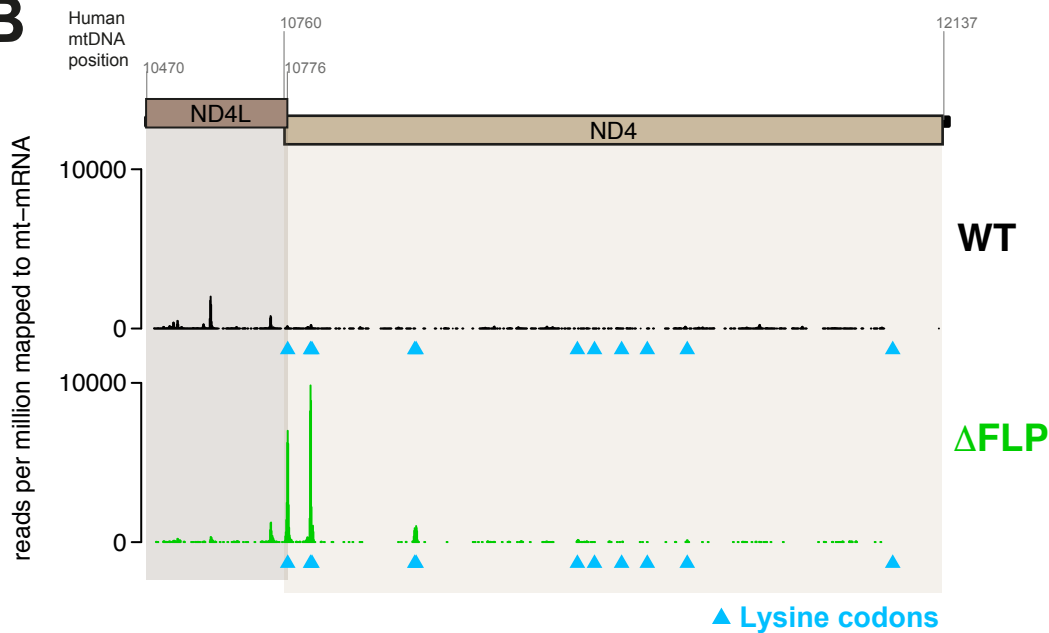

Supplement: supp [file elife_poa_e27596_Figure_3_figure_supplement_1.pdf › elife_poa_e27596_Figure_3_figure_supplement_1.pdf]

**A**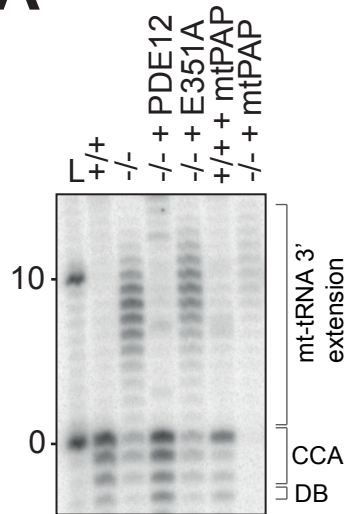**B**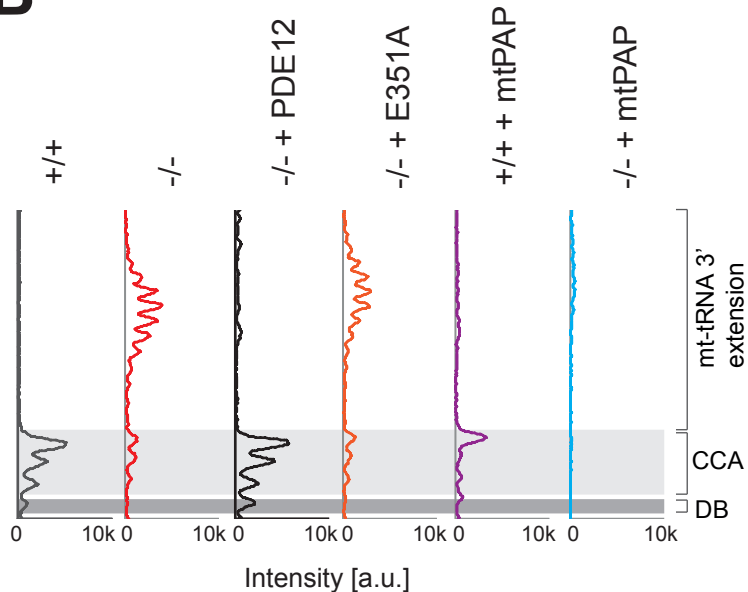

Supplement: supp [file elife_poa_e27596_Figure_4_figure_supplement_1.pdf › elife_poa_e27596_Figure_4_figure_supplement_1.pdf]

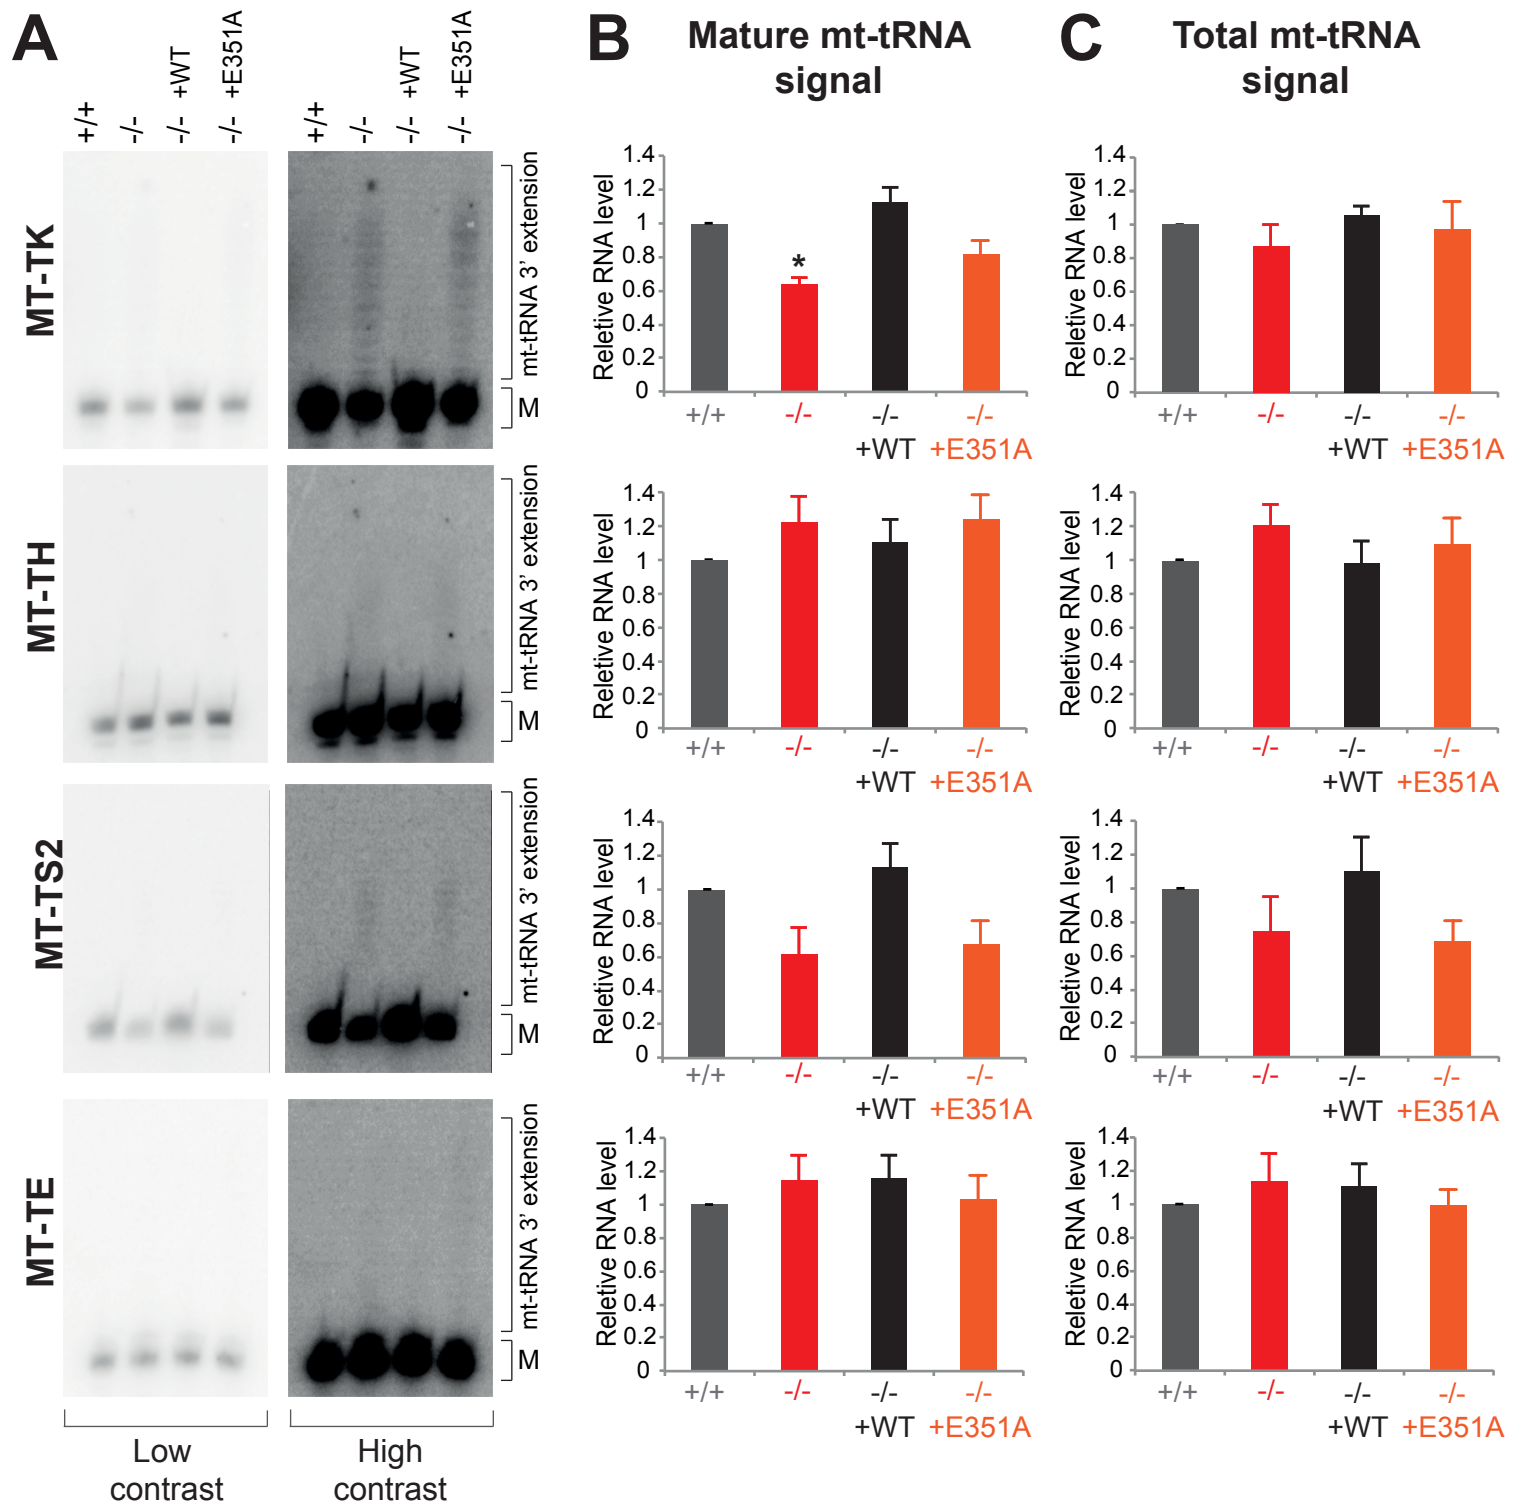

Supplement: supp [file elife_poa_e27596_Figure_4_figure_supplement_2.pdf › elife_poa_e27596_Figure_4_figure_supplement_2.pdf]

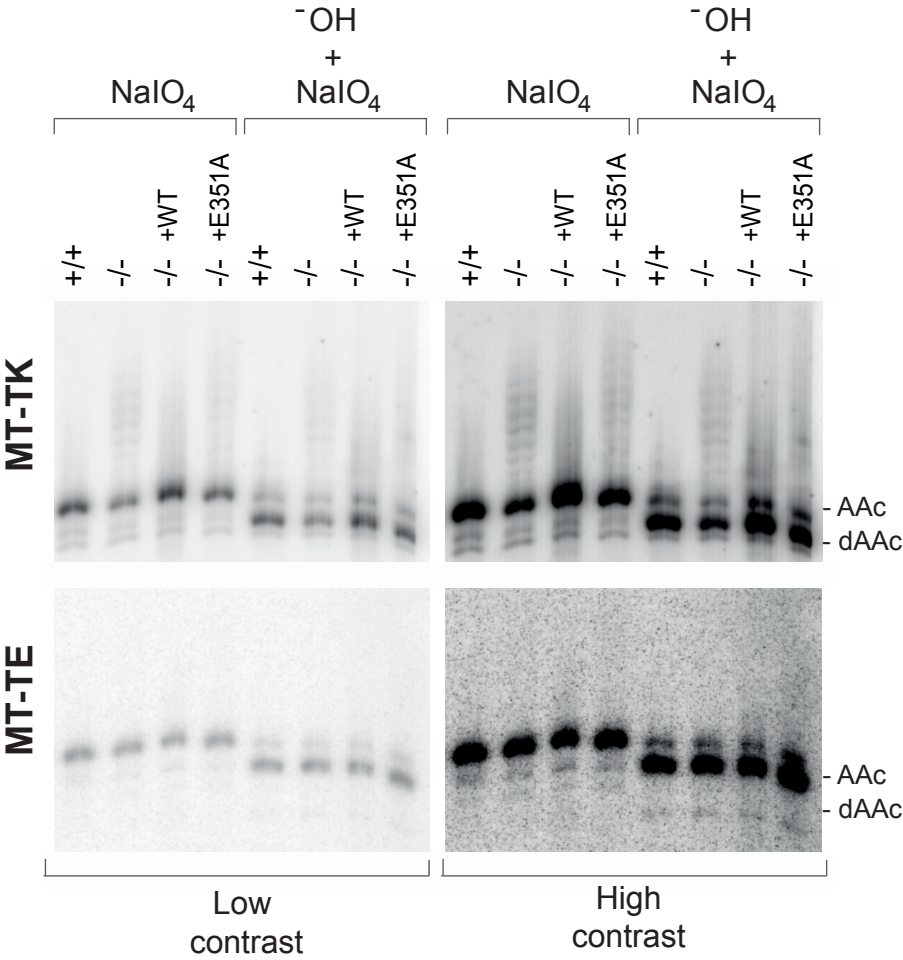

Supplement: supp [file elife_poa_e27596_Figure_4_figure_supplement_3.pdf › elife_poa_e27596_Figure_4_figure_supplement_3.pdf]

**A**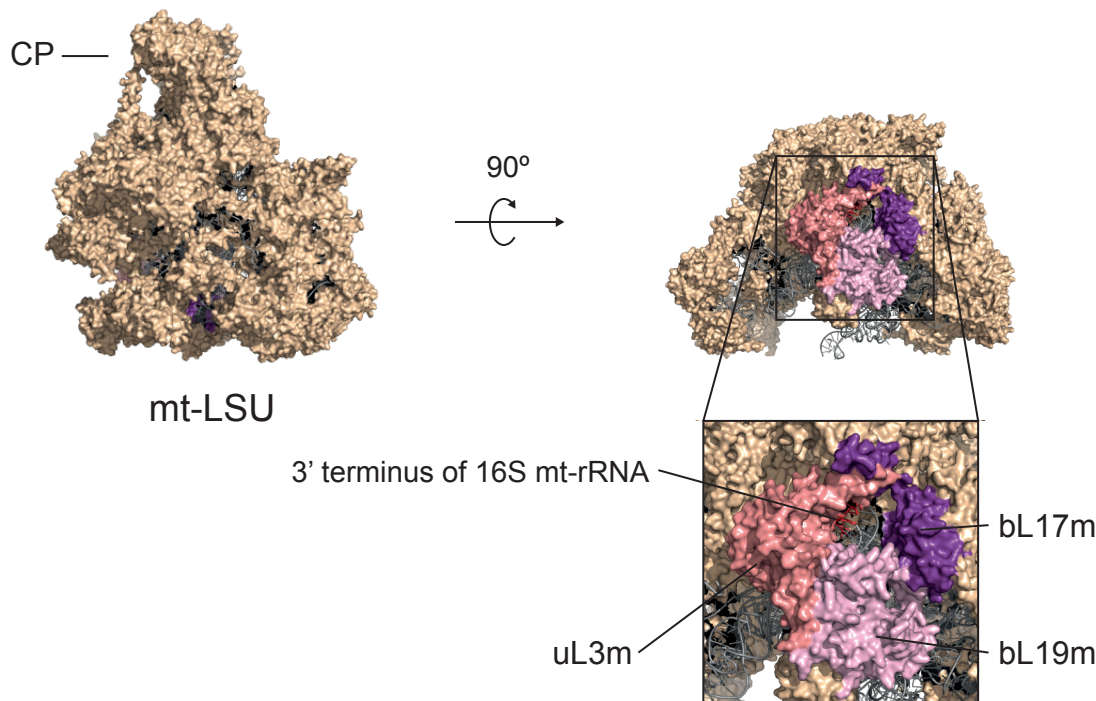**B**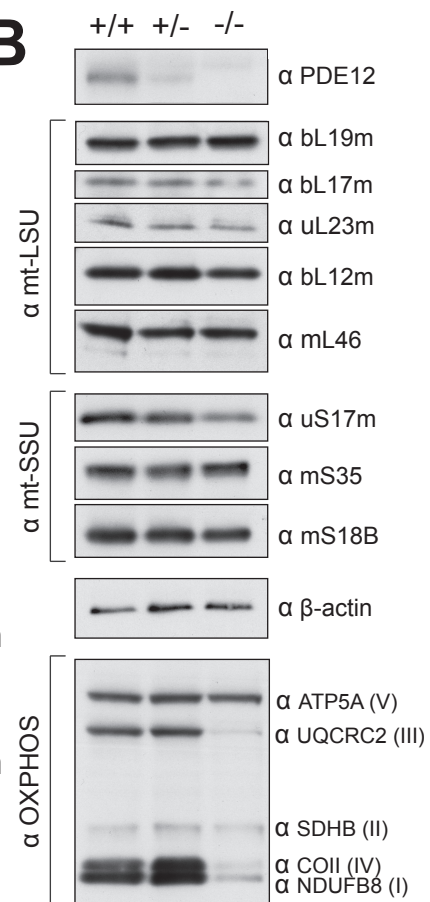

Supplement: supp [file elife_poa_e27596_Figure_5_figure_supplement_1.pdf › elife_poa_e27596_Figure_5_figure_supplement_1.pdf]

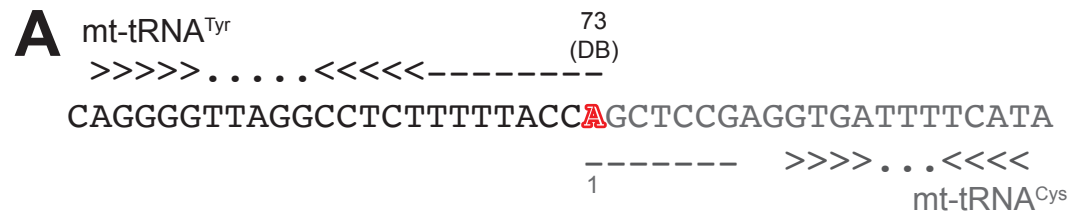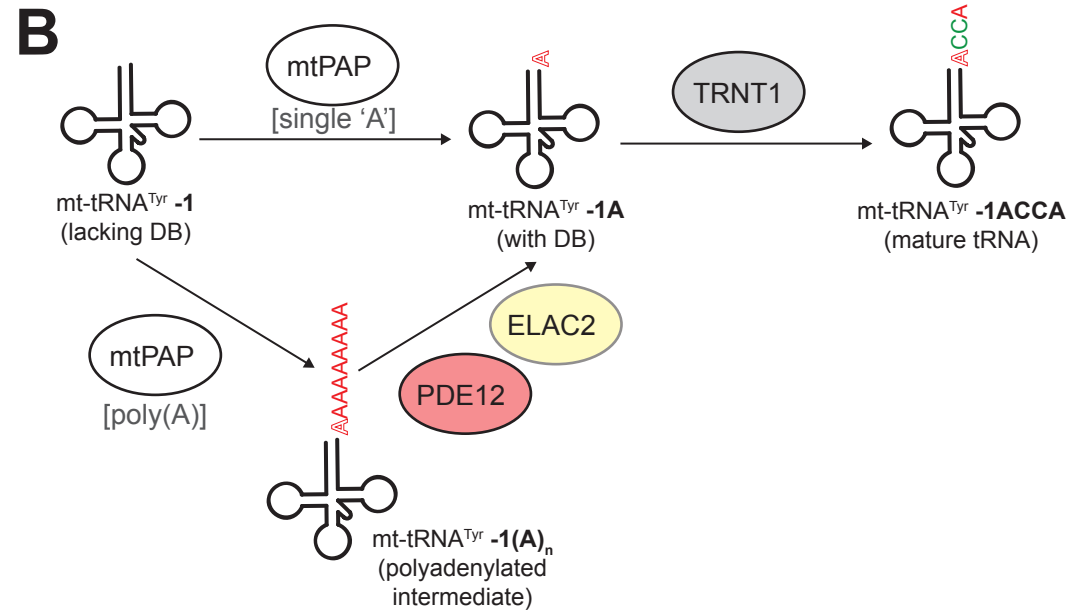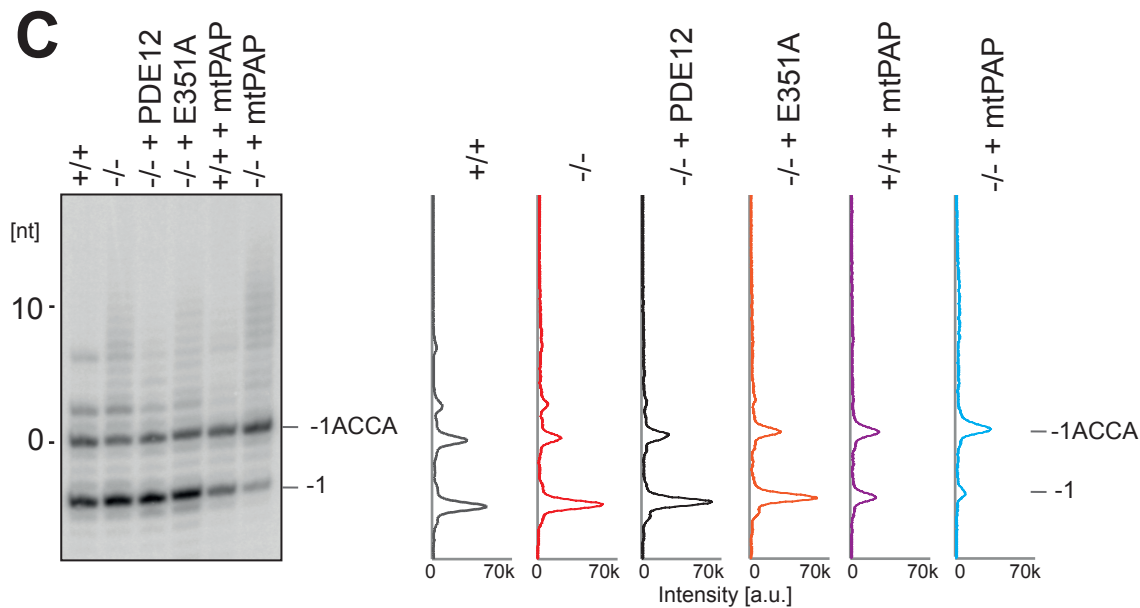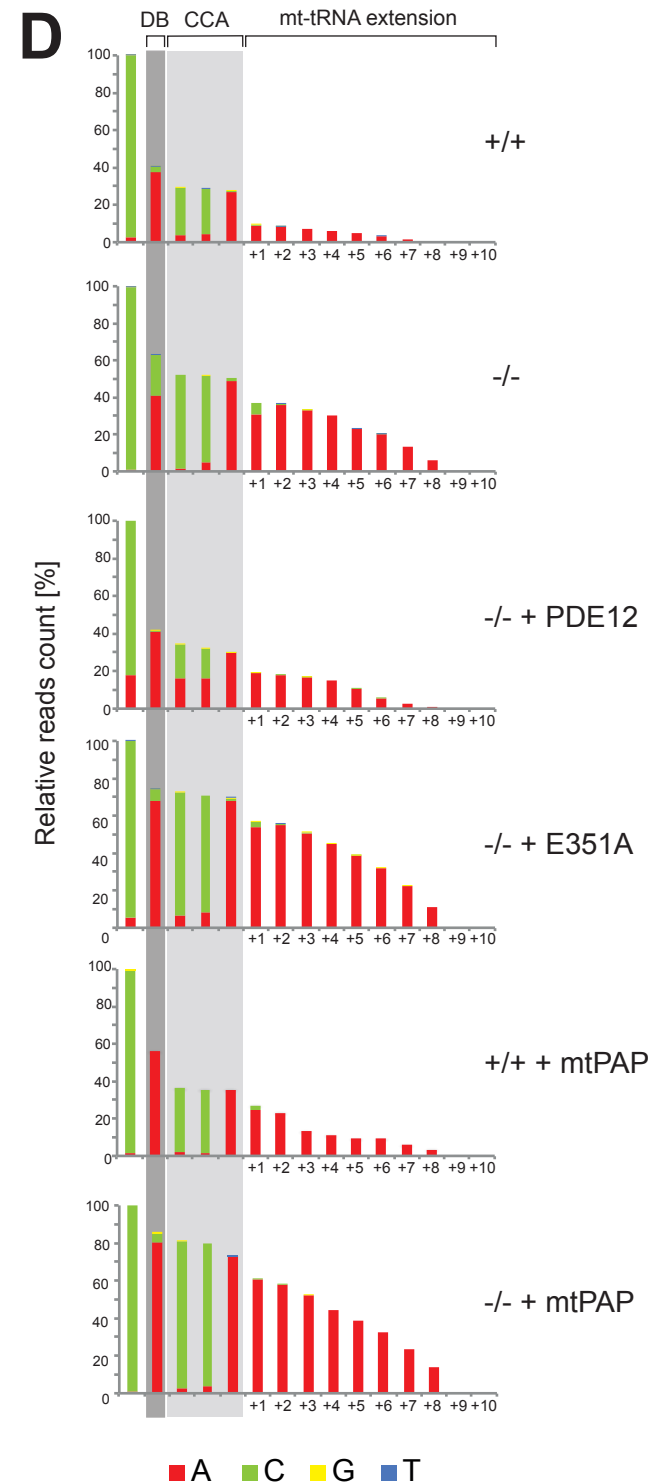

Supplement: supp [file elife_poa_e27596_Figure_6_figure_supplement_1.pdf › elife_poa_e27596_Figure_6_figure_supplement_1.pdf]
